# Supplementary material for: Quantifying urban, industrial, and background changes in NO 2 during the COVID-19 lockdown period based on TROPOMI satellite observations
Source: Copernicus journal article supplement (doi:10.5194/acp-2021-536), 2021-07-06

# China

## Mean NO2 VCD (DU)

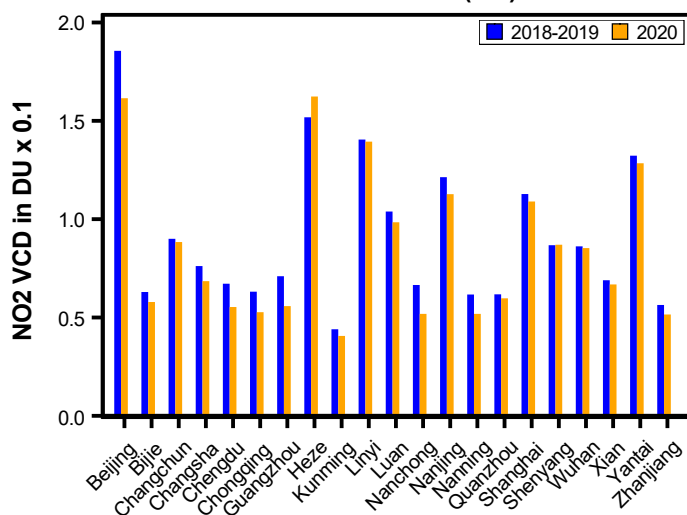

## 2020 vs.2018-2019 (%)

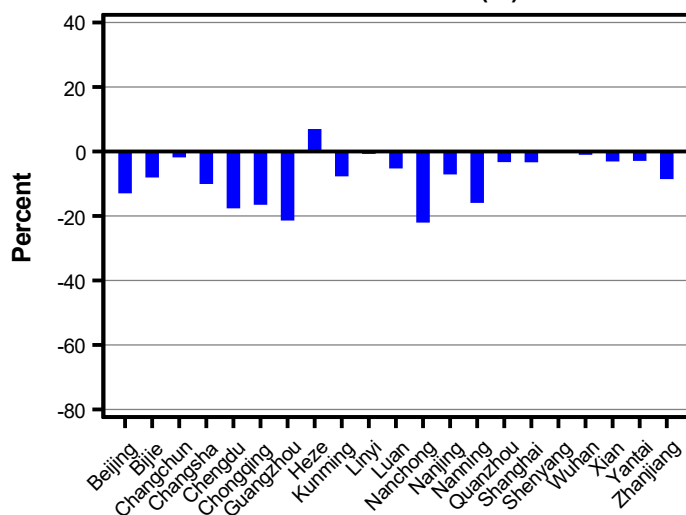

## Estimated Annual Emission Rates per Capita

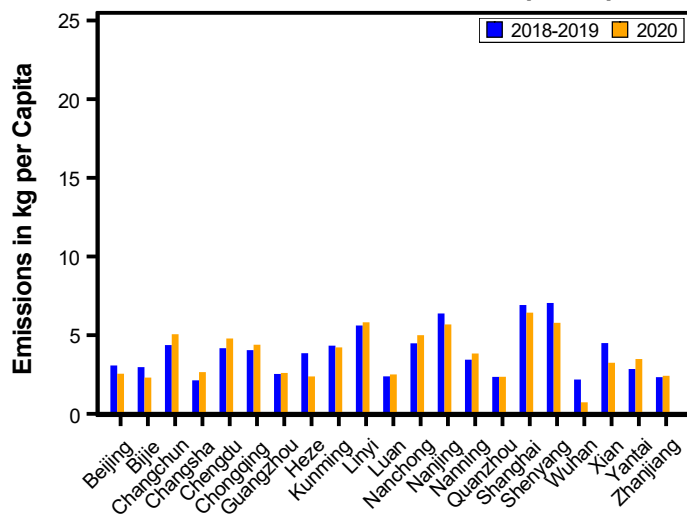

## 2020 vs.2018-2019 (%)

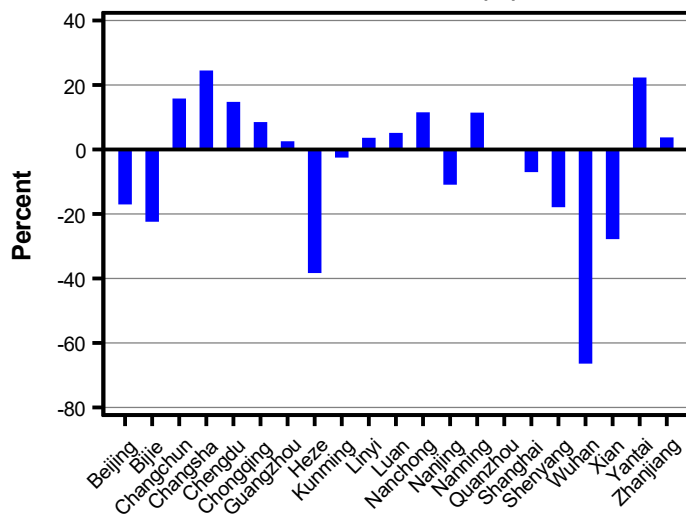

## Estimated Annual Industrial Emission Rates

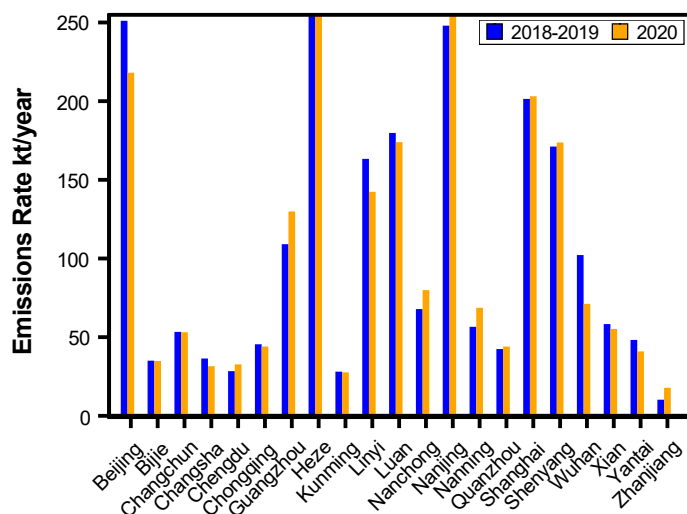

## 2020 vs.2018-2019 (%)

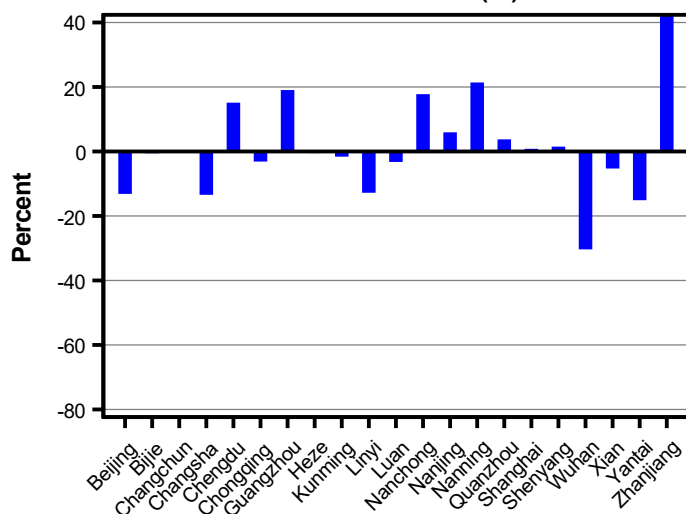

# Africa

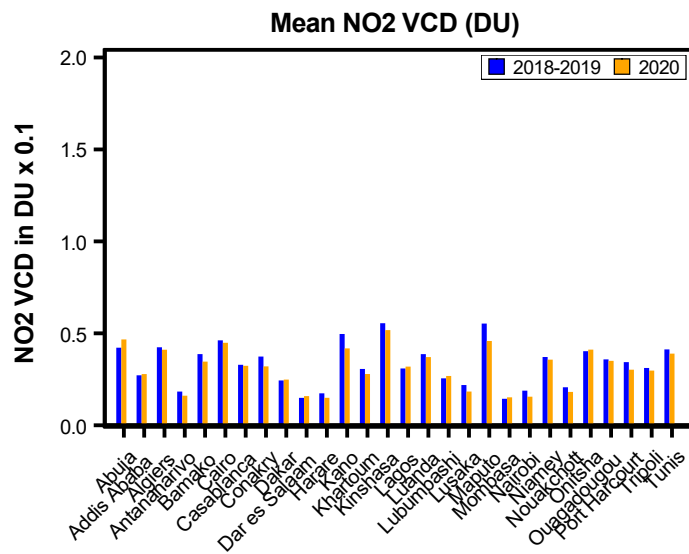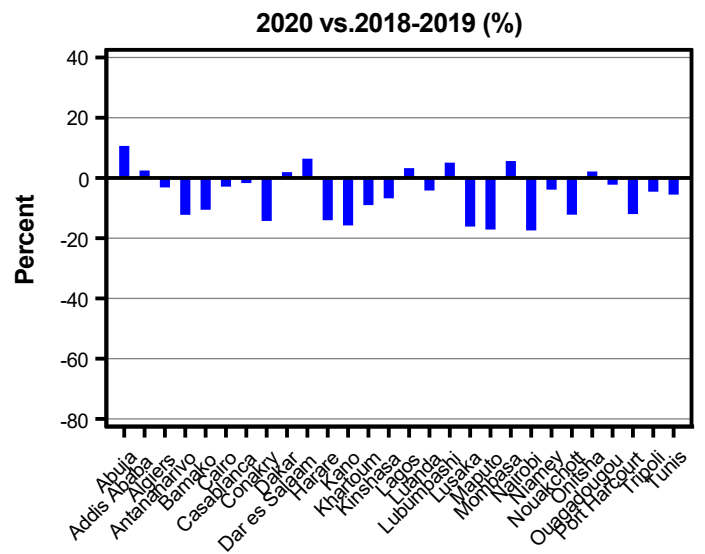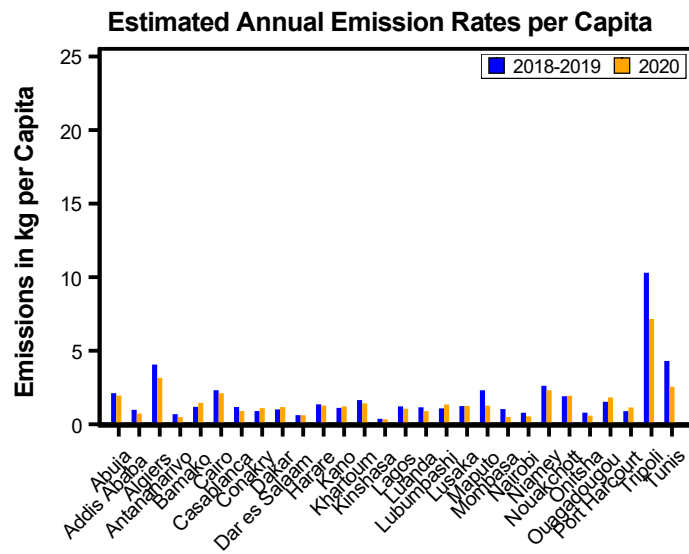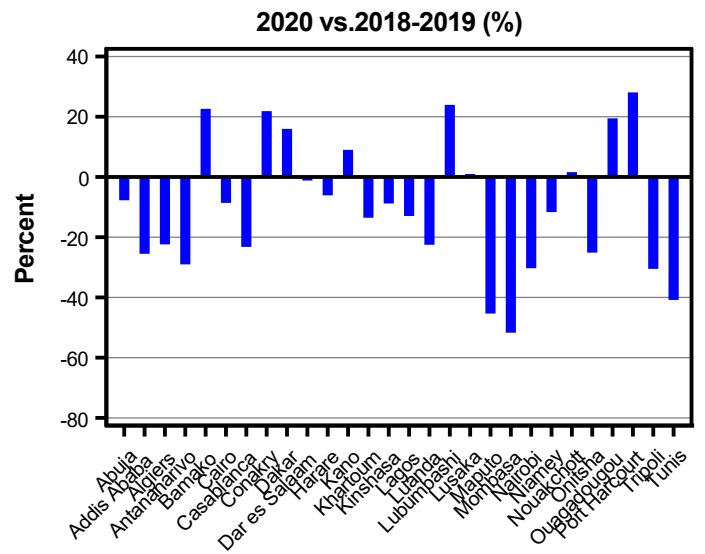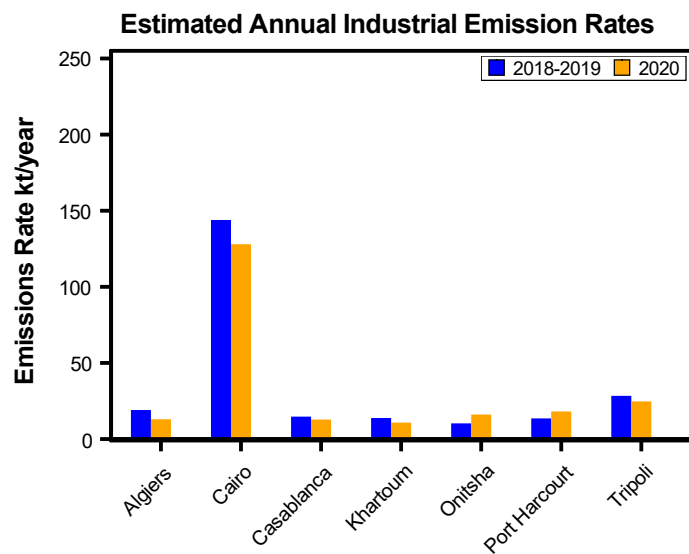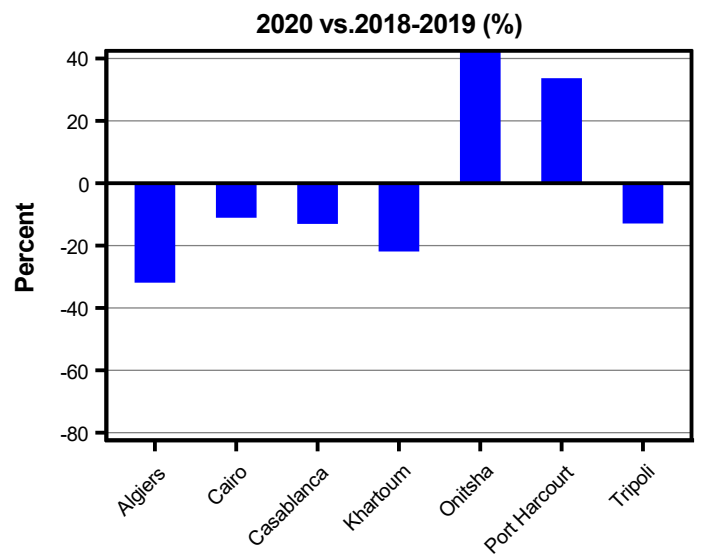

## Europe-2

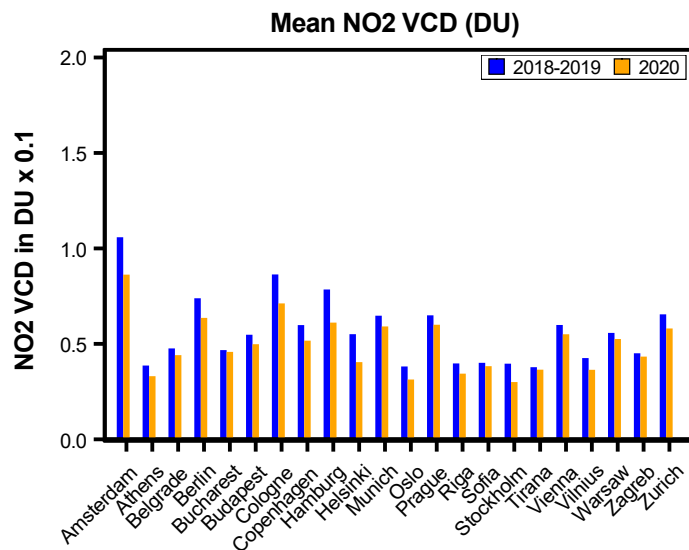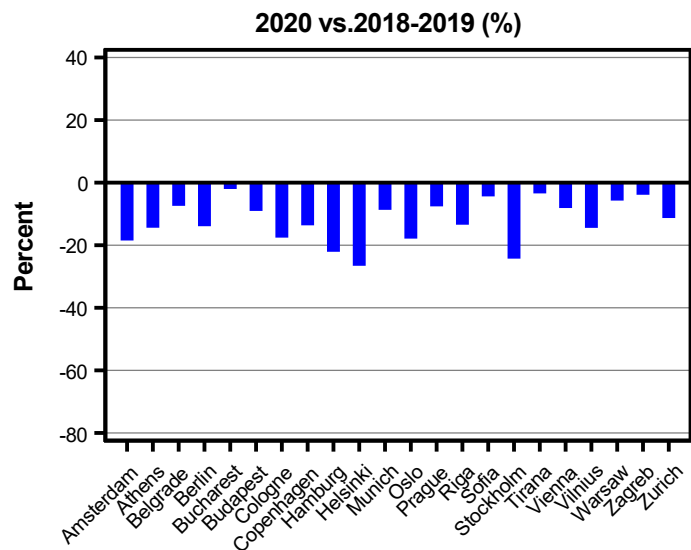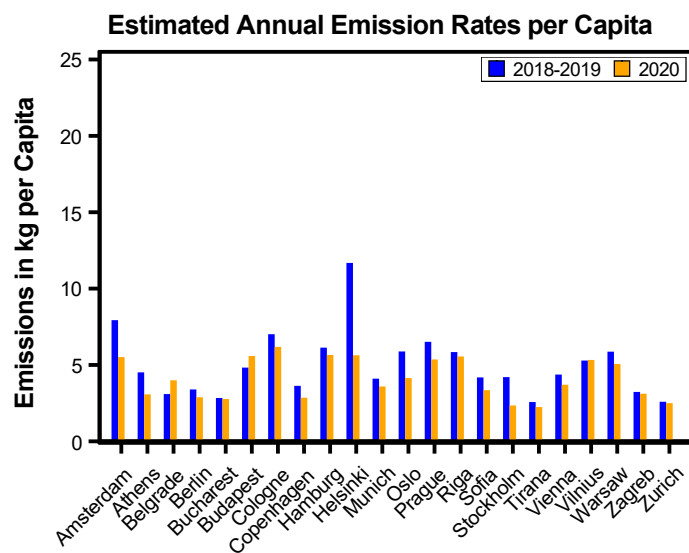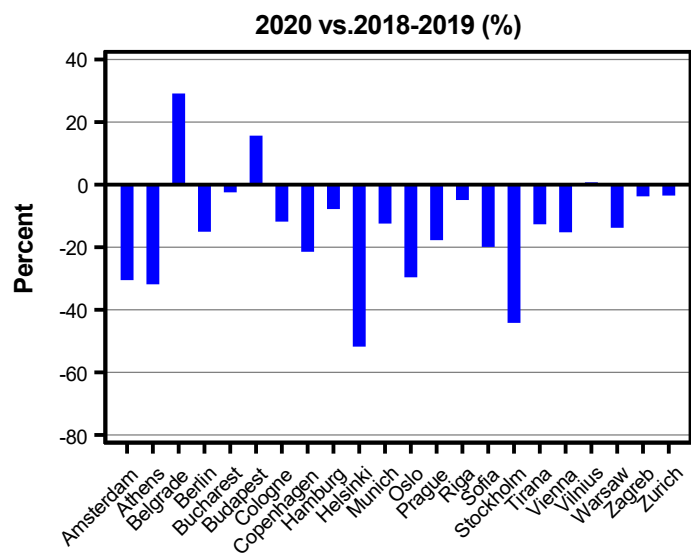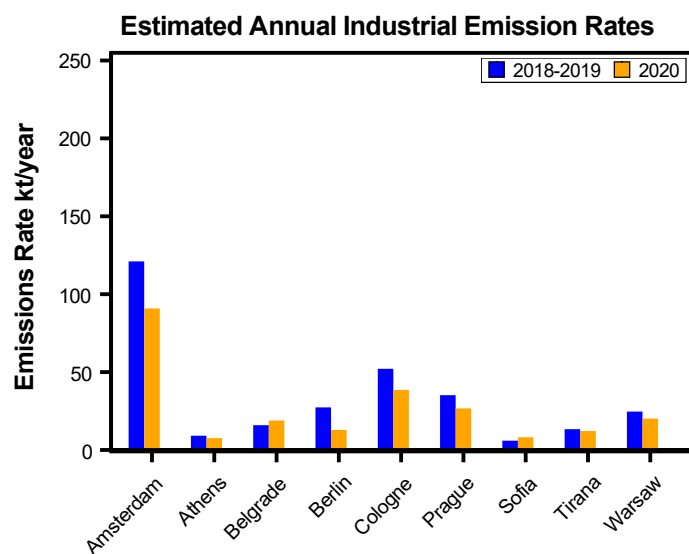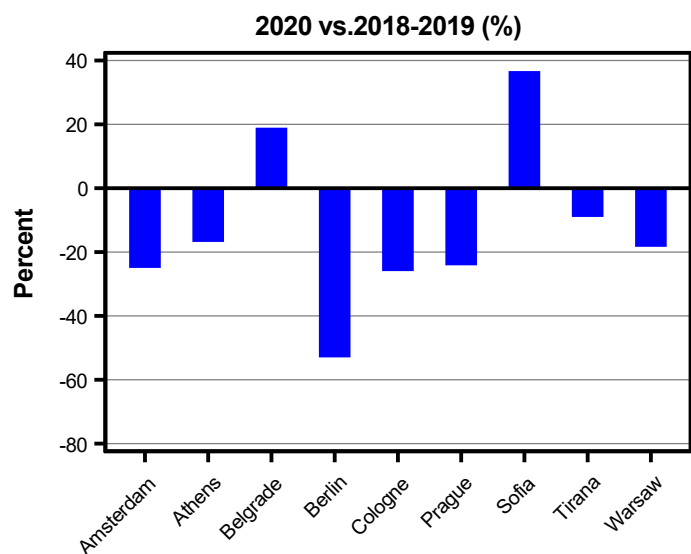

# Japan Korea Taiwan

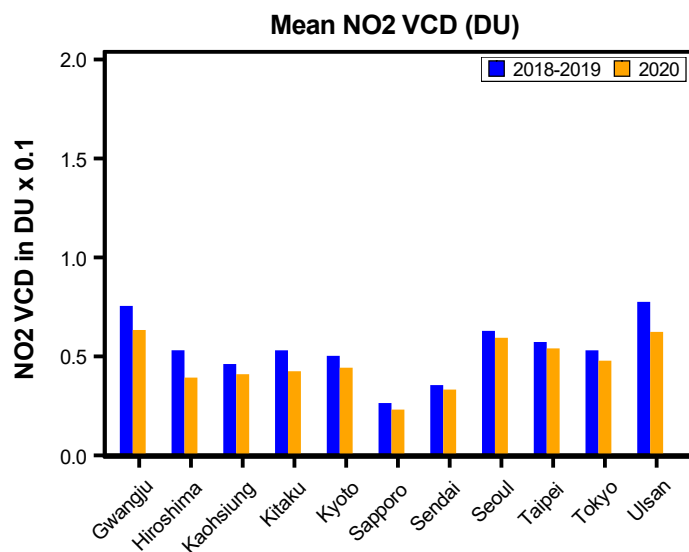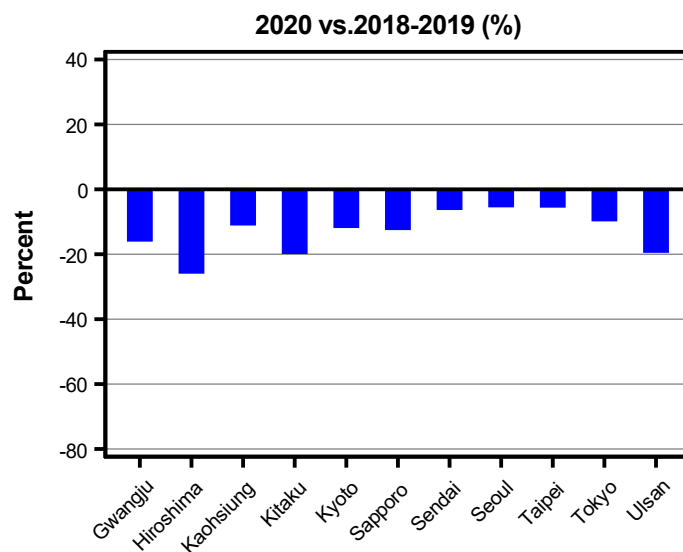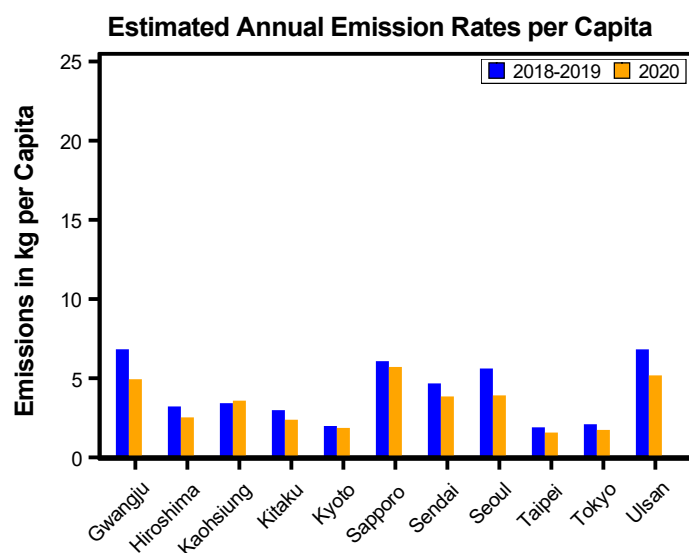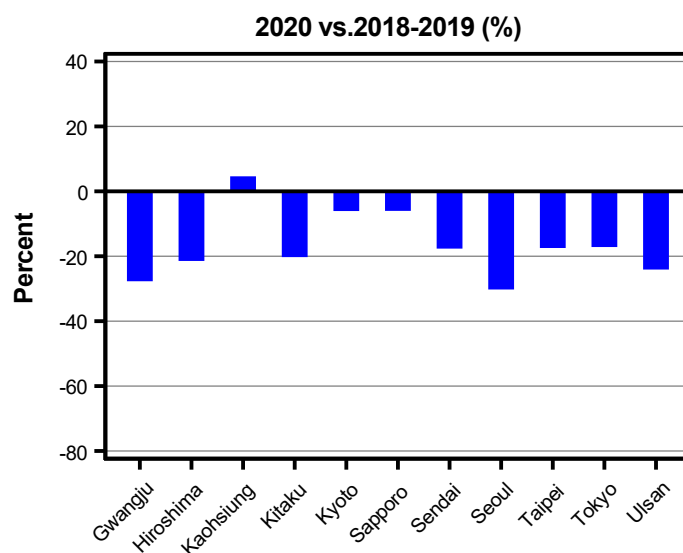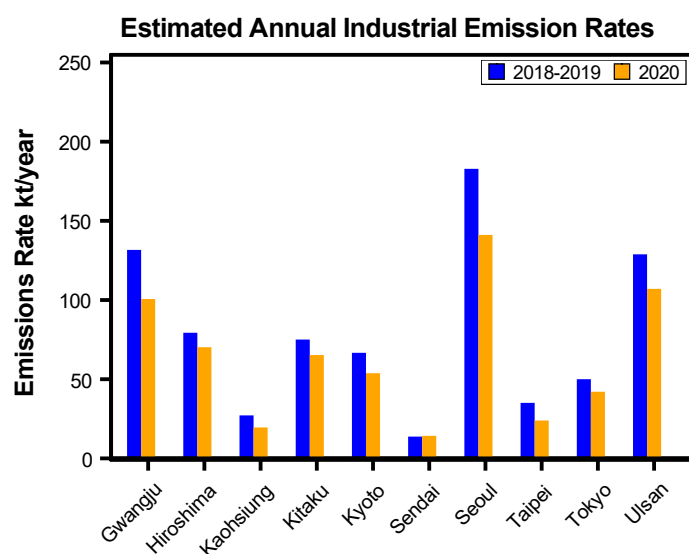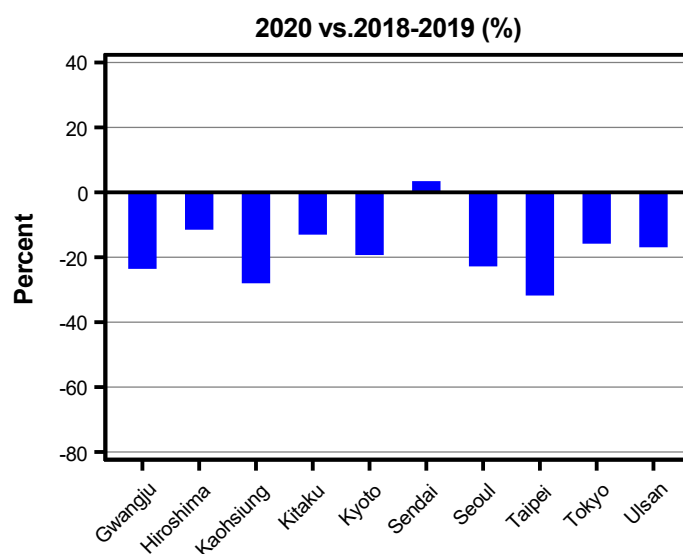

# Northern Eurasia

## Mean NO2 VCD (DU)

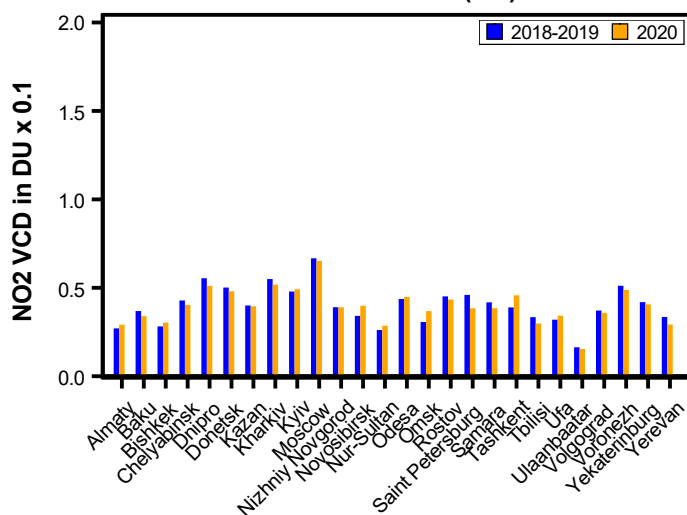

## 2020 vs.2018-2019 (%)

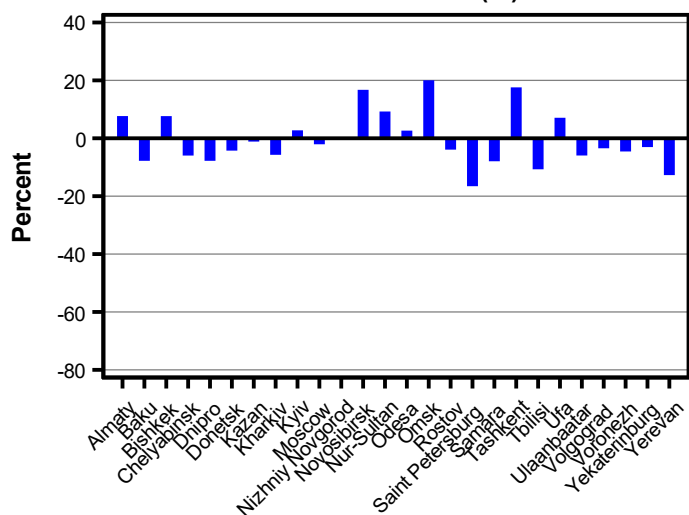

## Estimated Annual Emission Rates per Capita

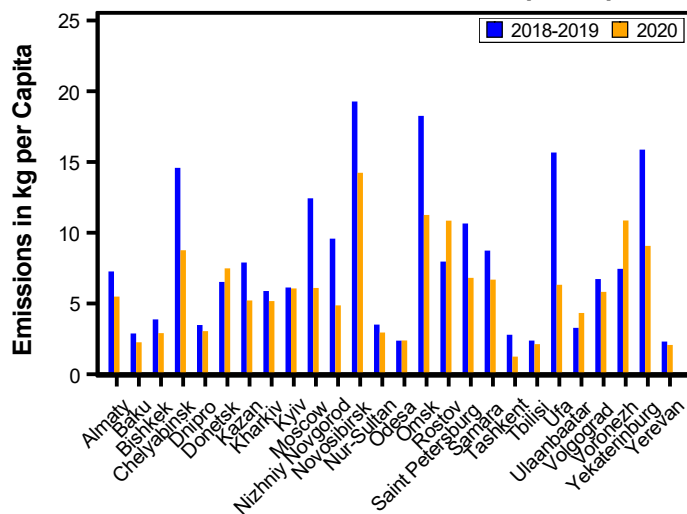

## 2020 vs.2018-2019 (%)

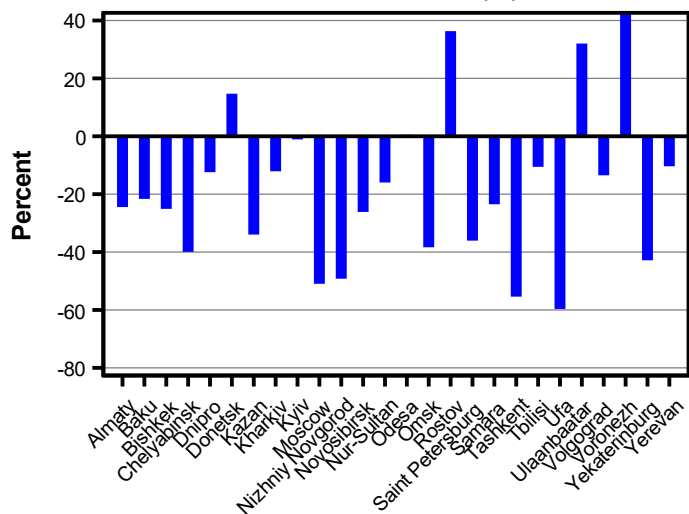

## Estimated Annual Industrial Emission Rates

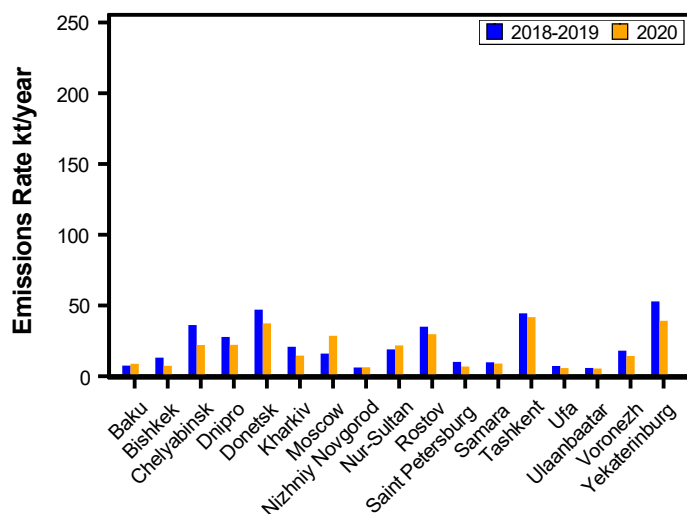

## 2020 vs.2018-2019 (%)

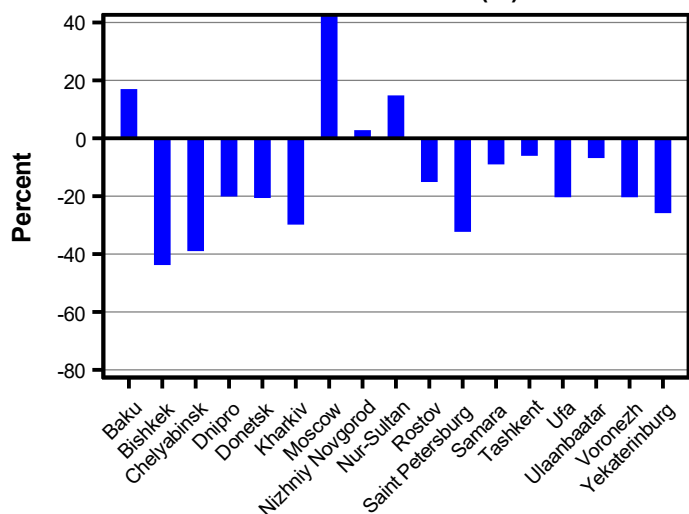

## Central America

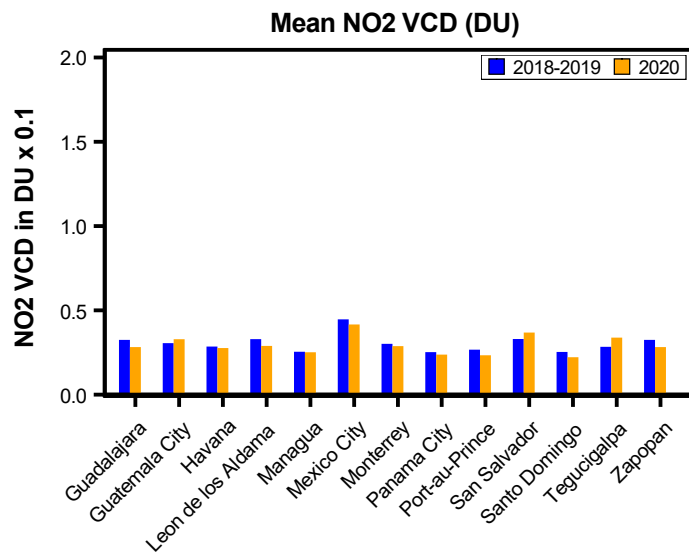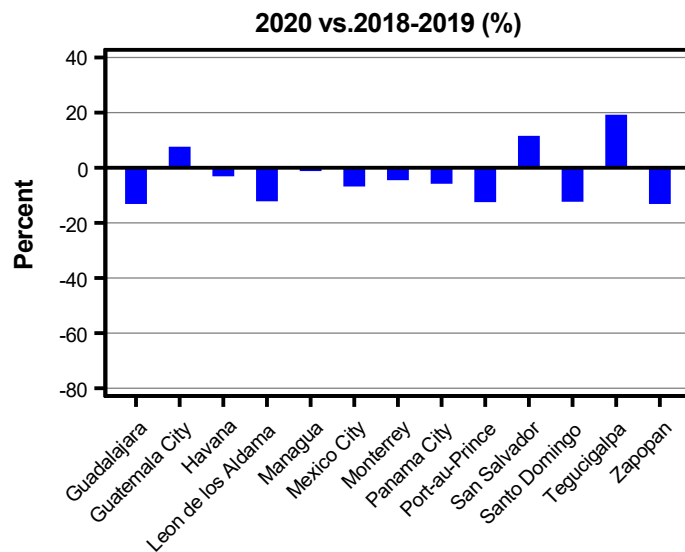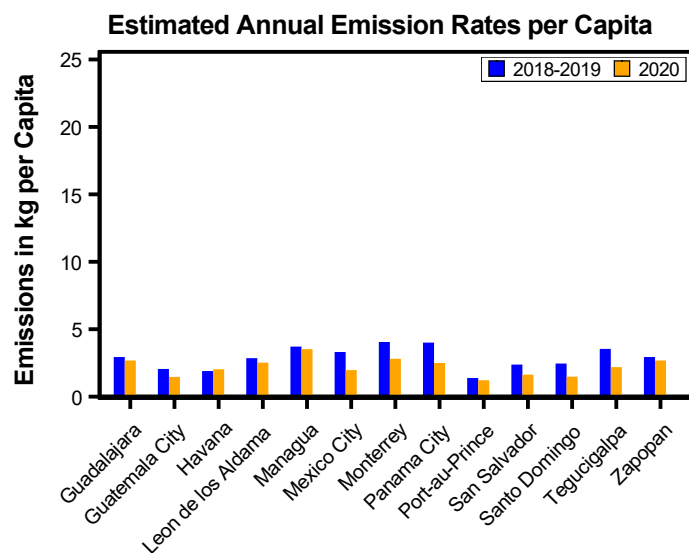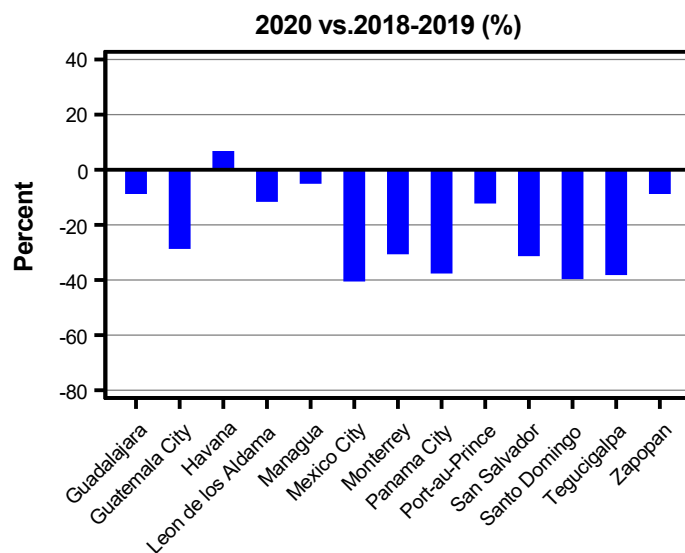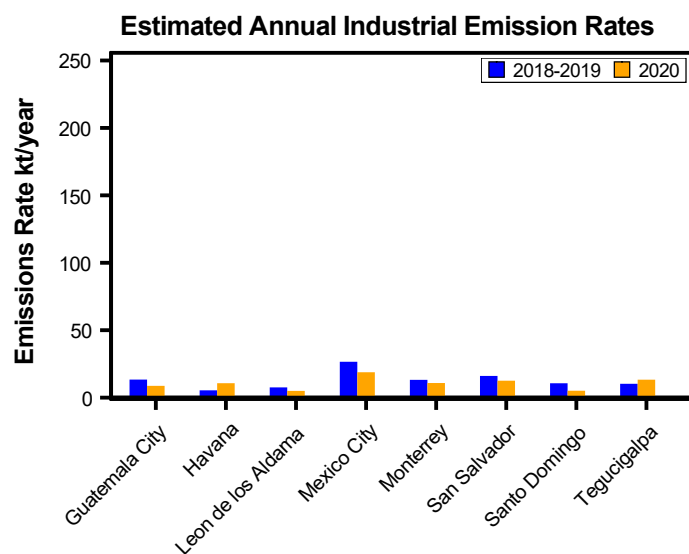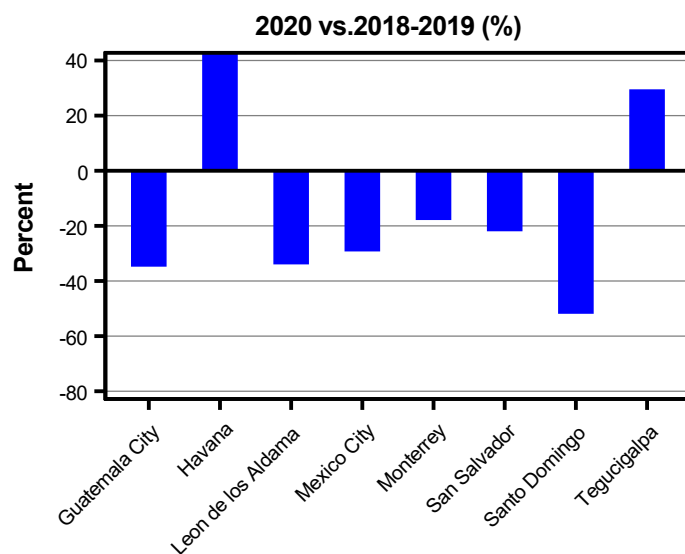

## Middle East

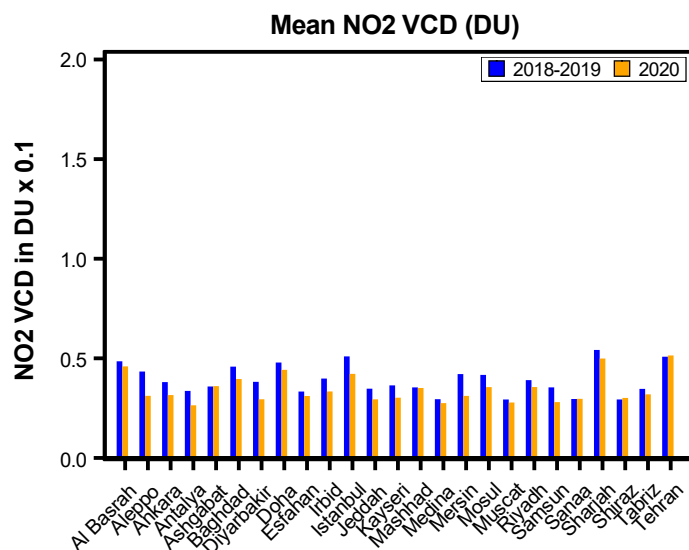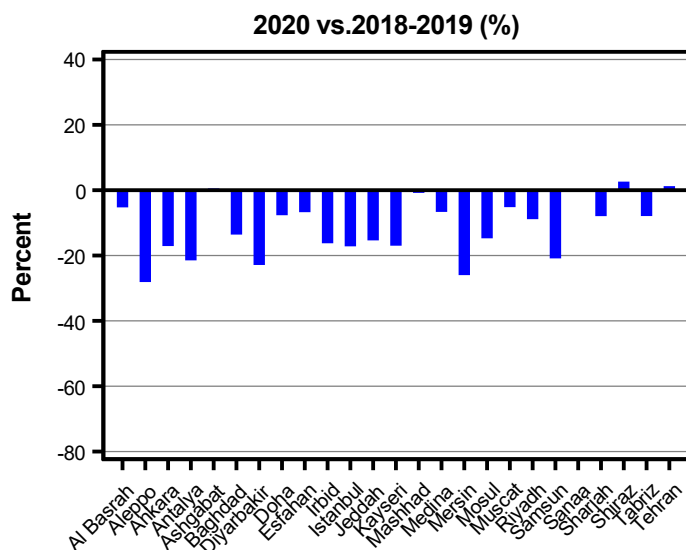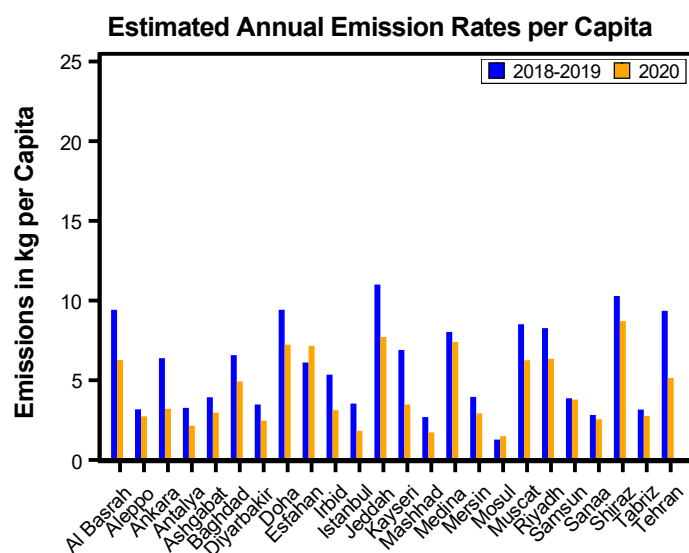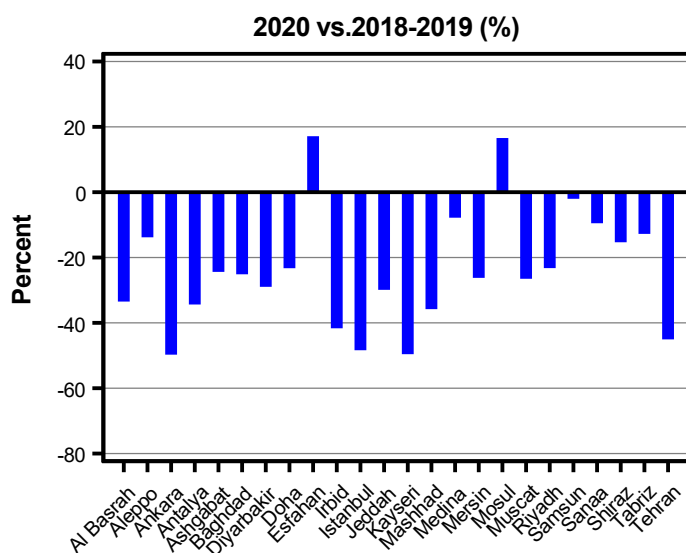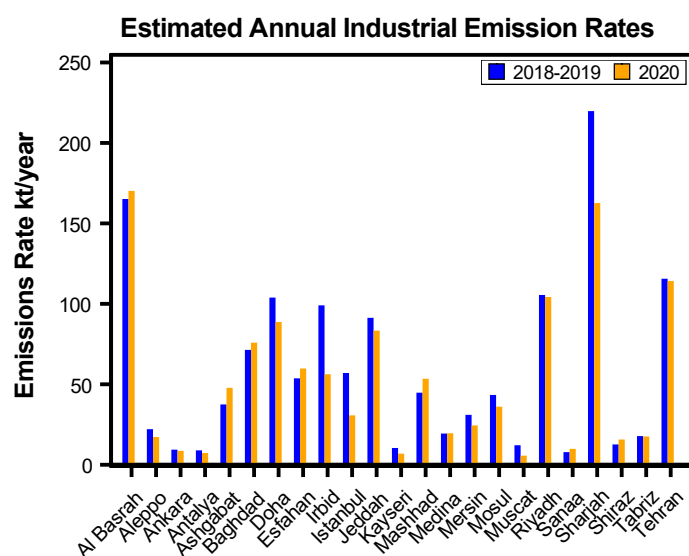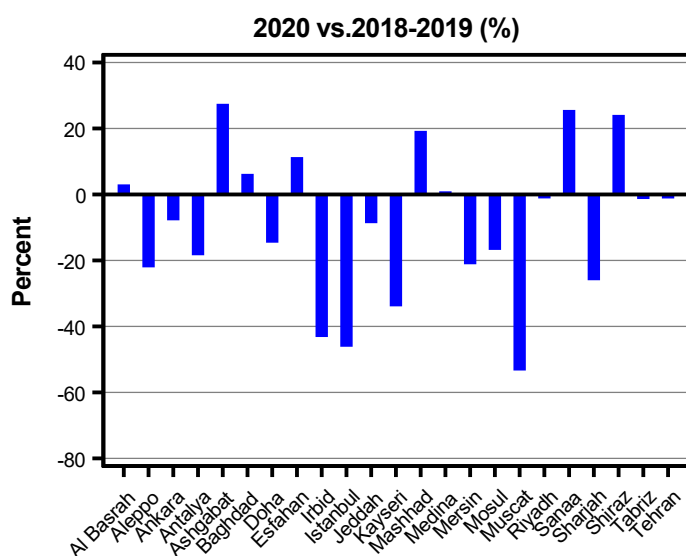

# Australia

## Mean NO2 VCD (DU)

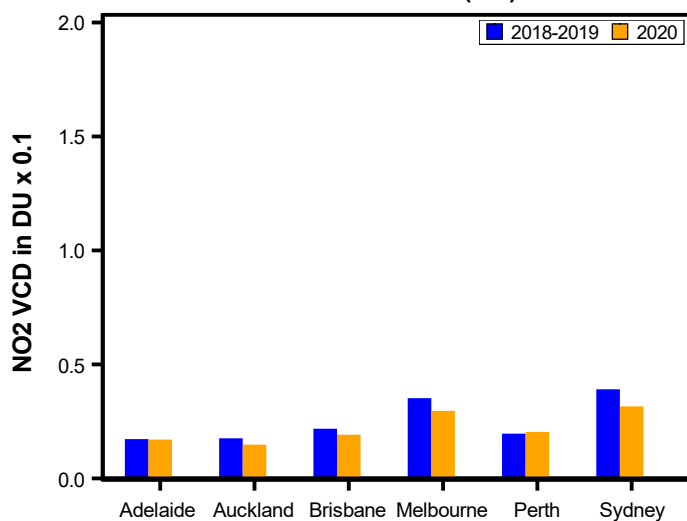

## 2020 vs.2018-2019 (%)

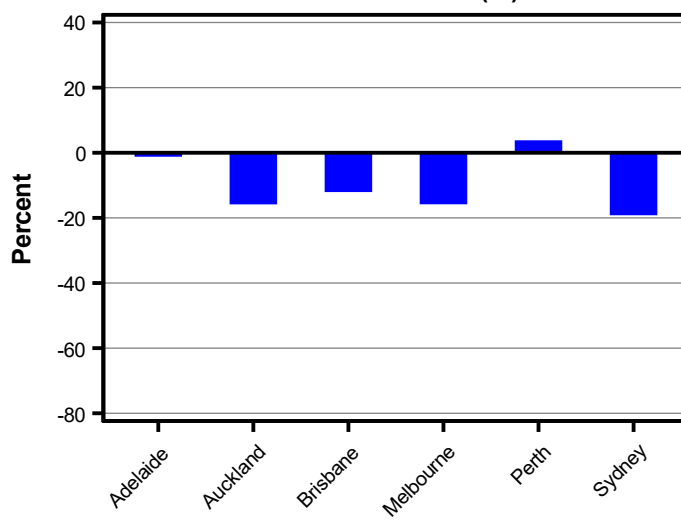

## Estimated Annual Emission Rates per Capita

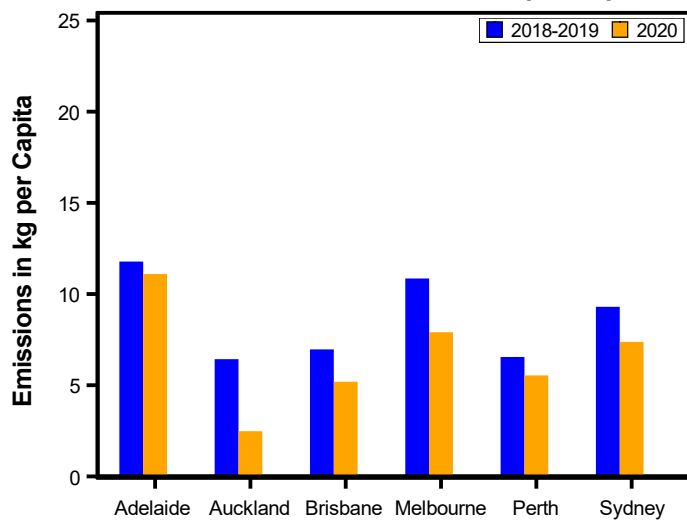

## 2020 vs.2018-2019 (%)

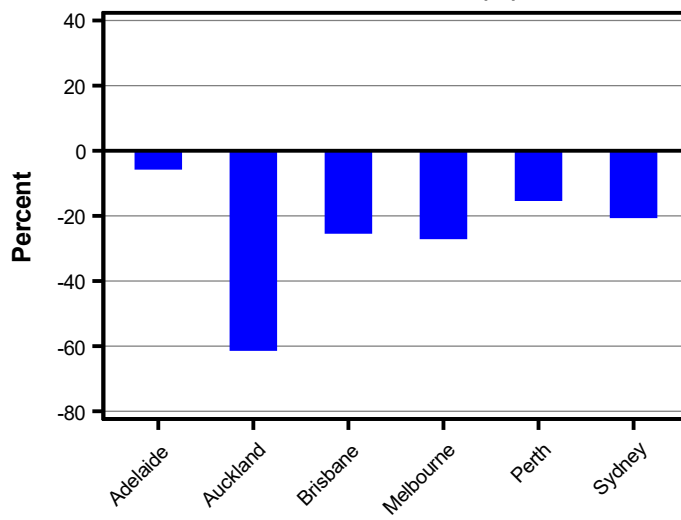

## Estimated Annual Industrial Emission Rates

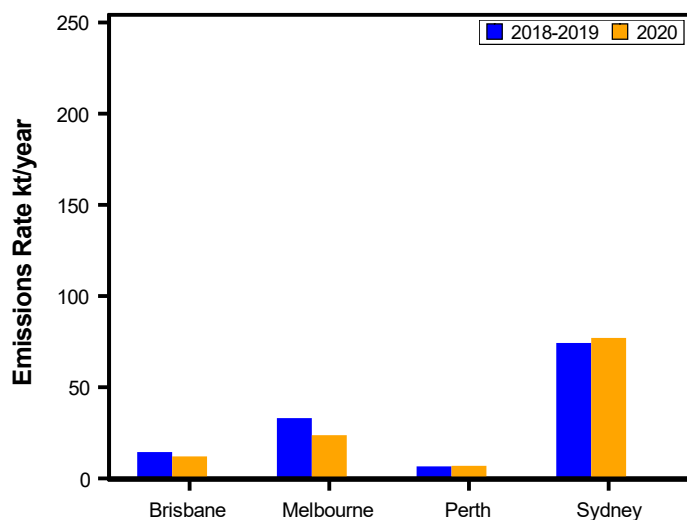

## 2020 vs.2018-2019 (%)

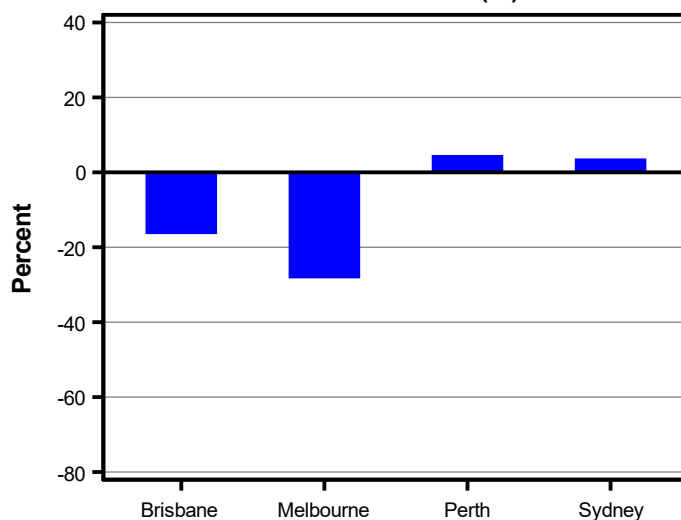



# Canada & U.S.

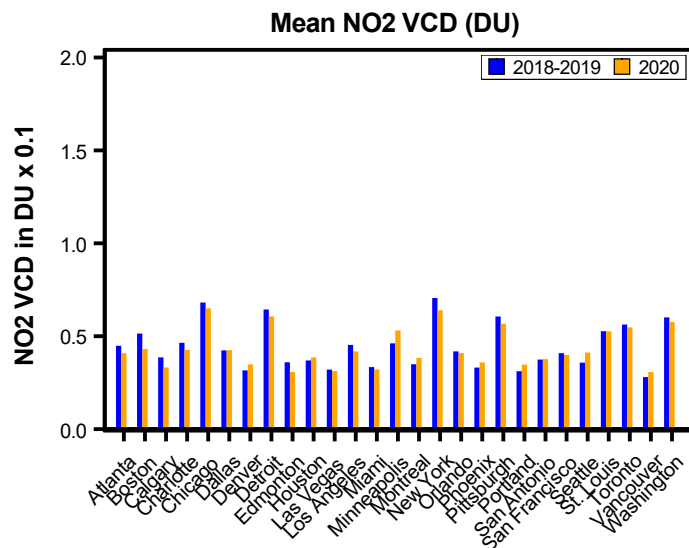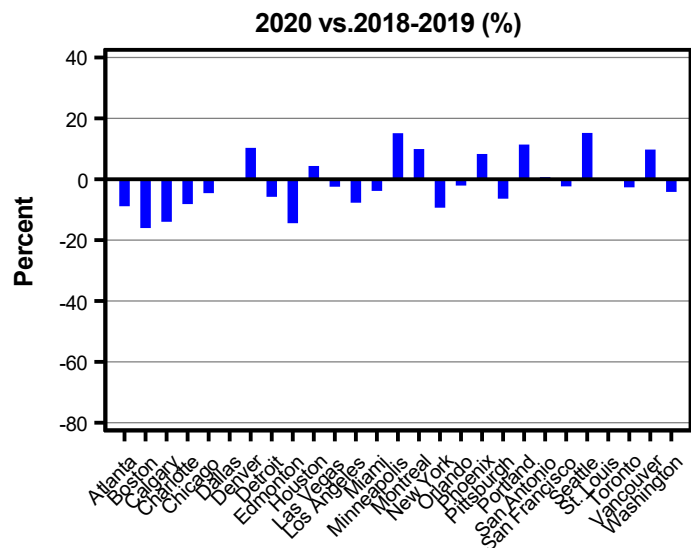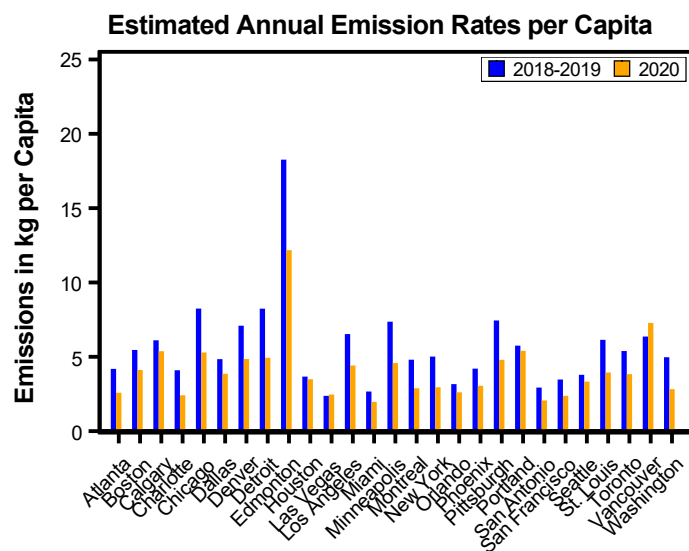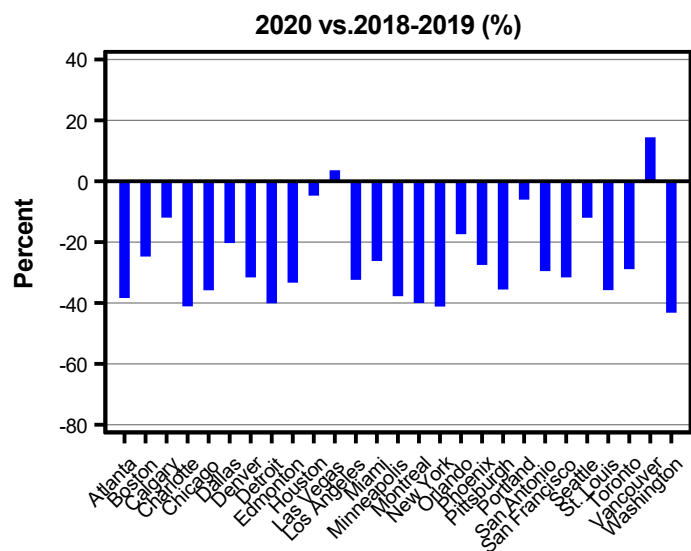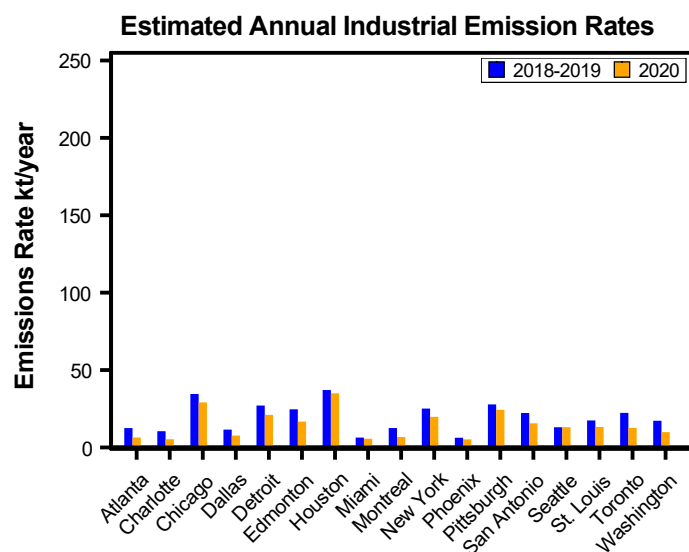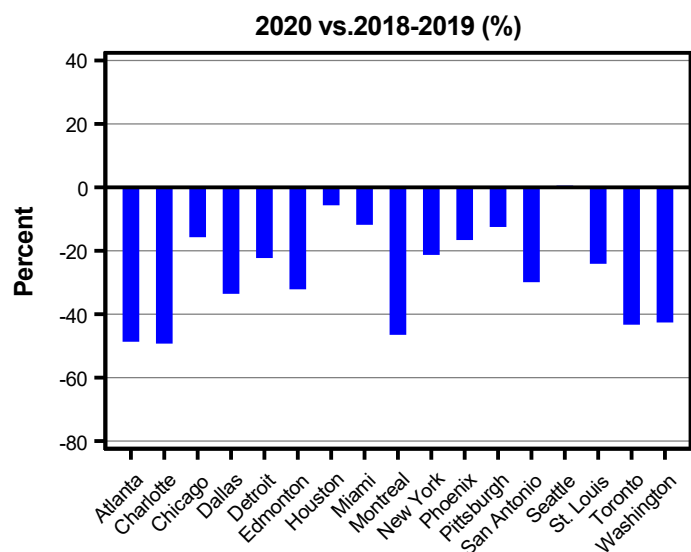

## S-E Asia

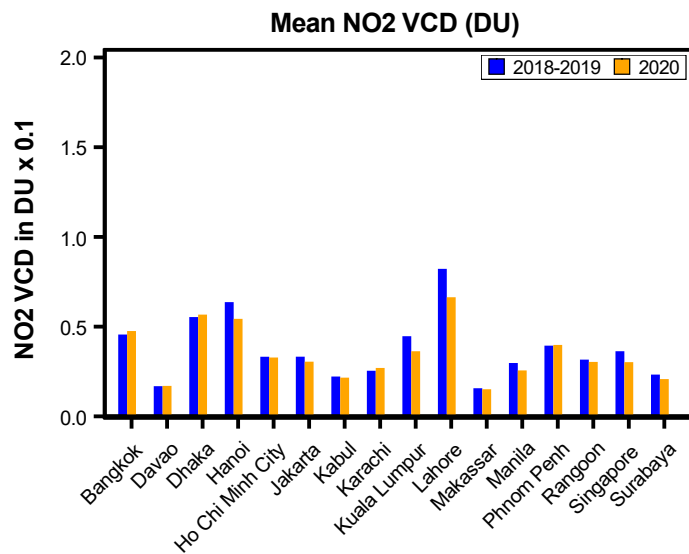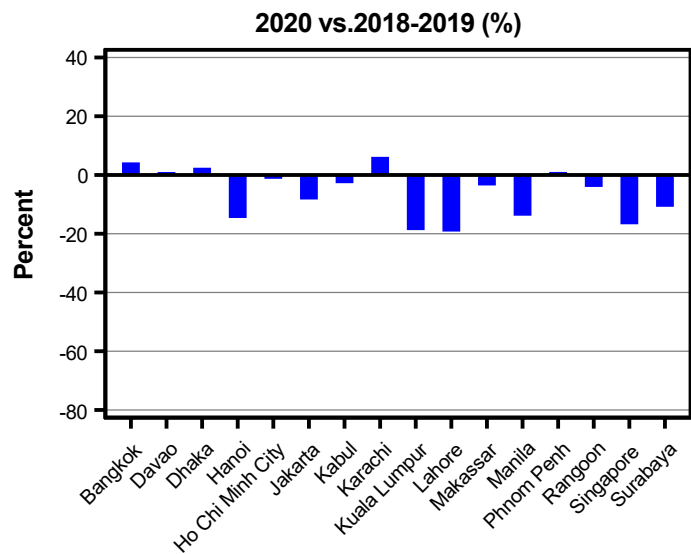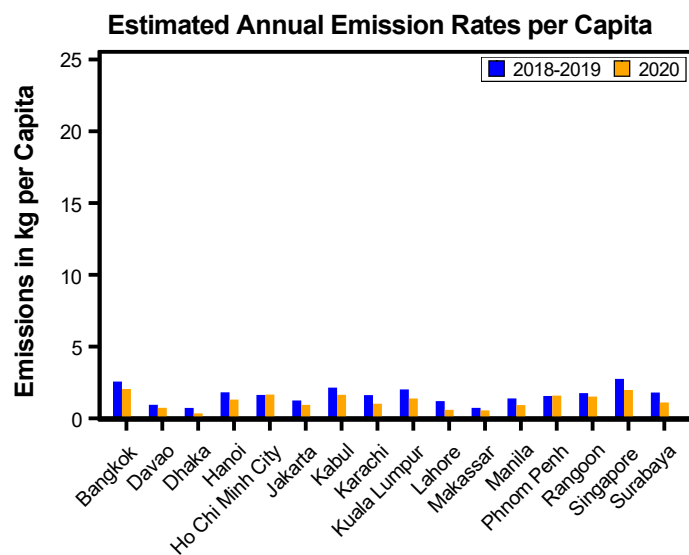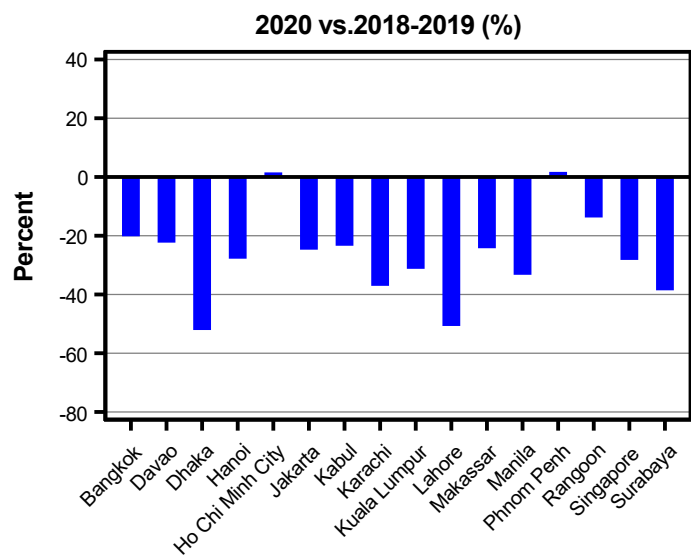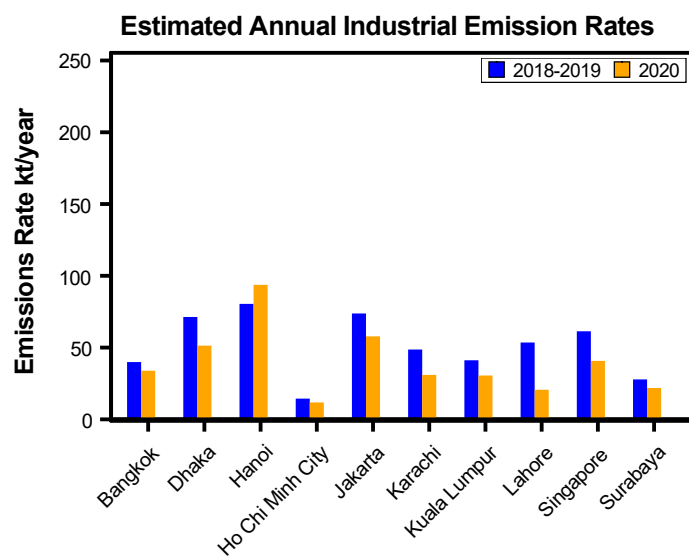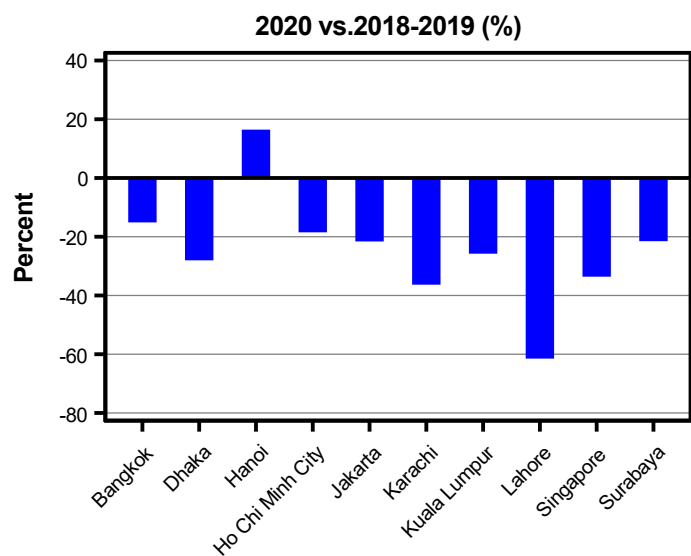

# South America

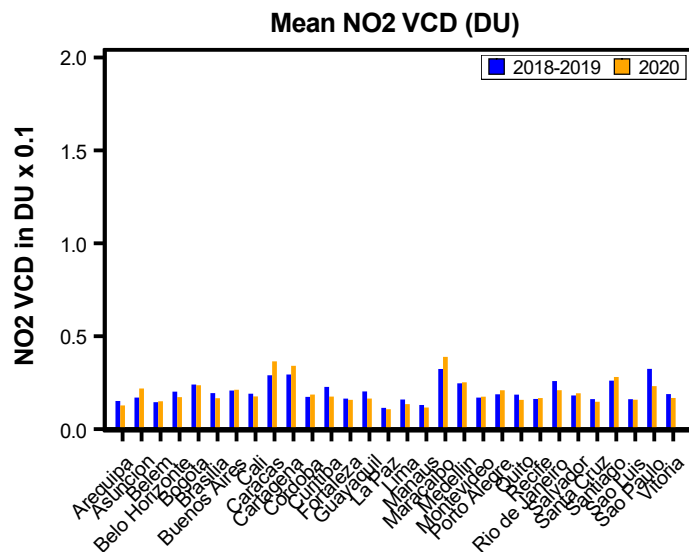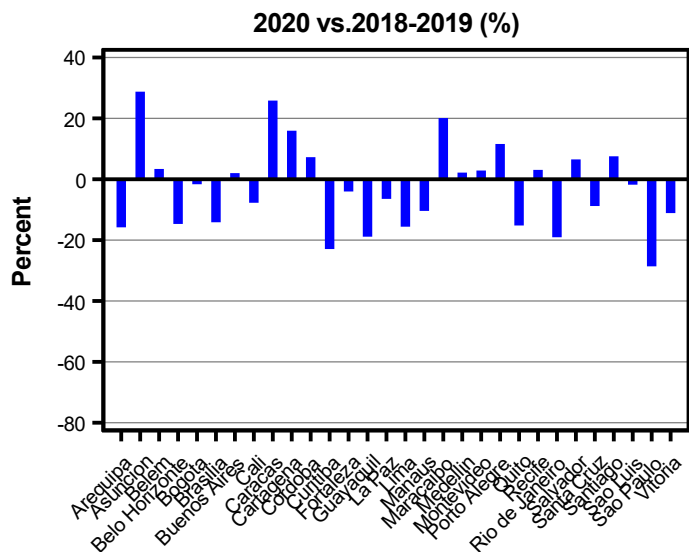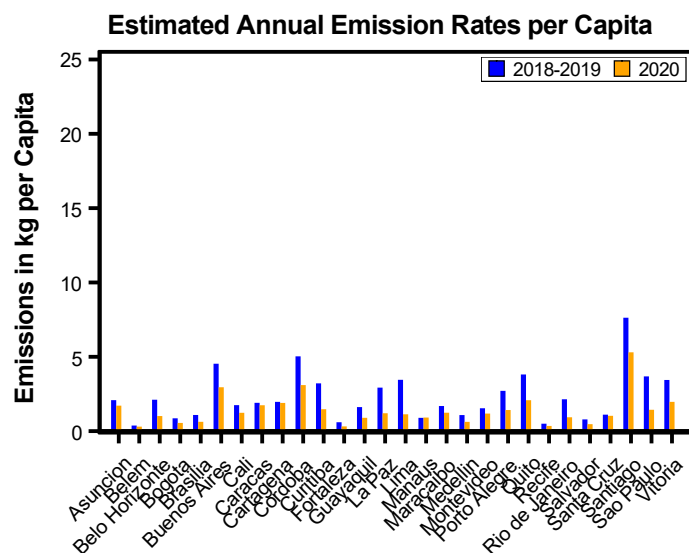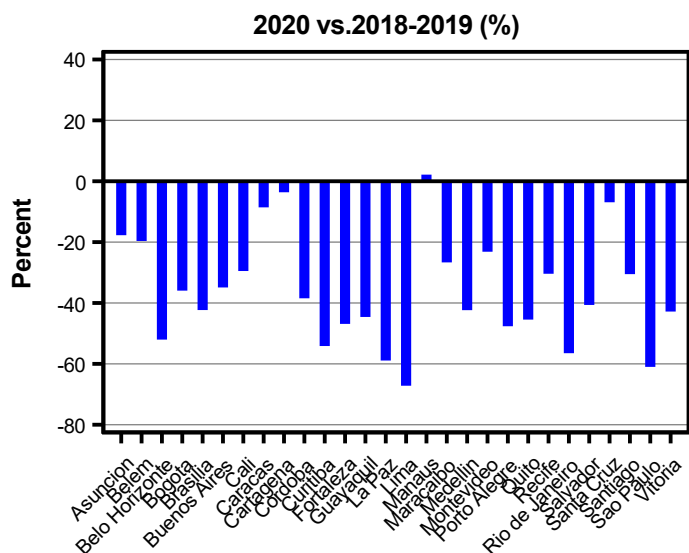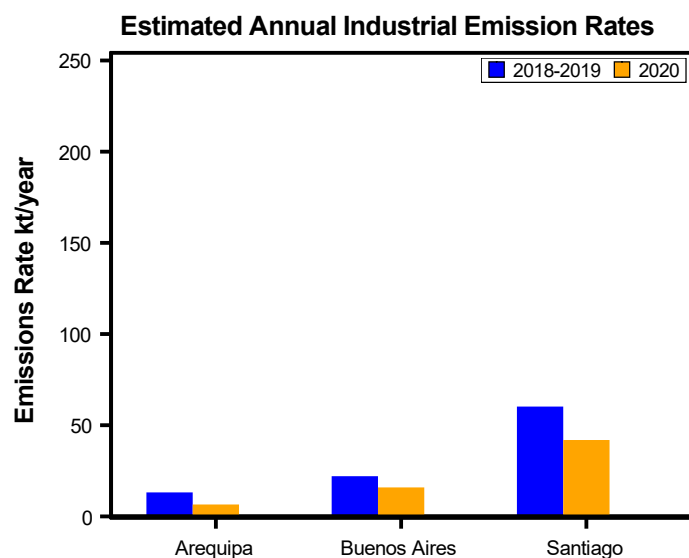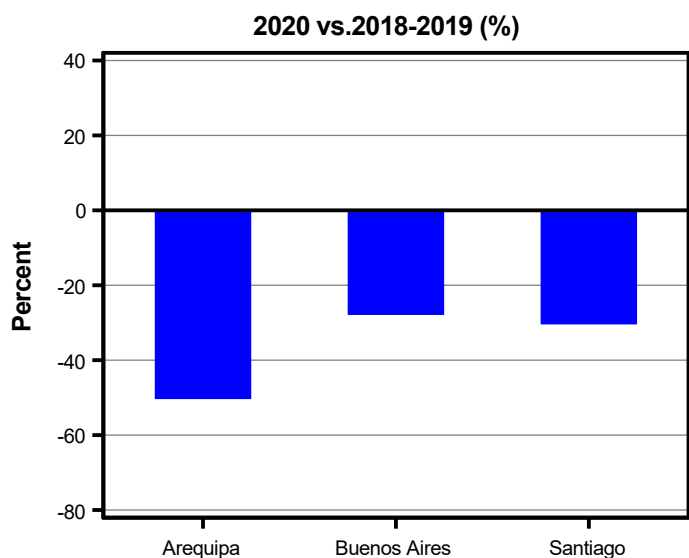

# India

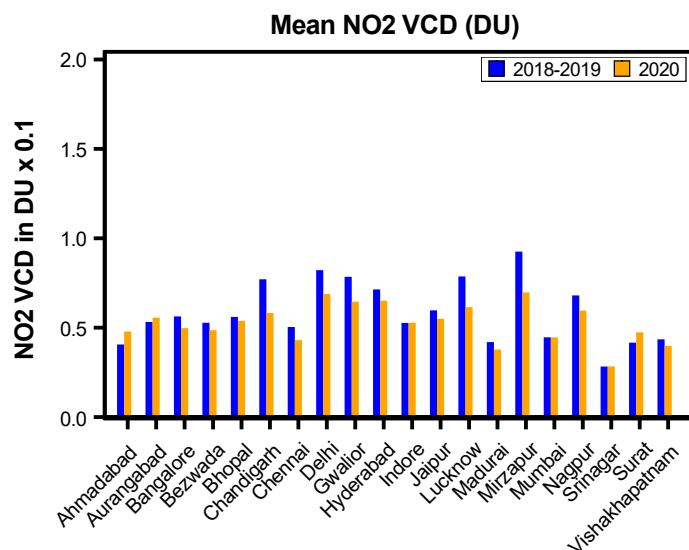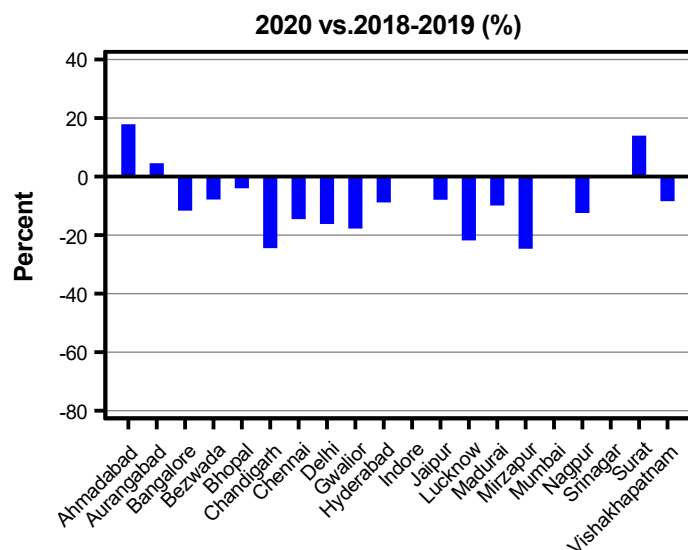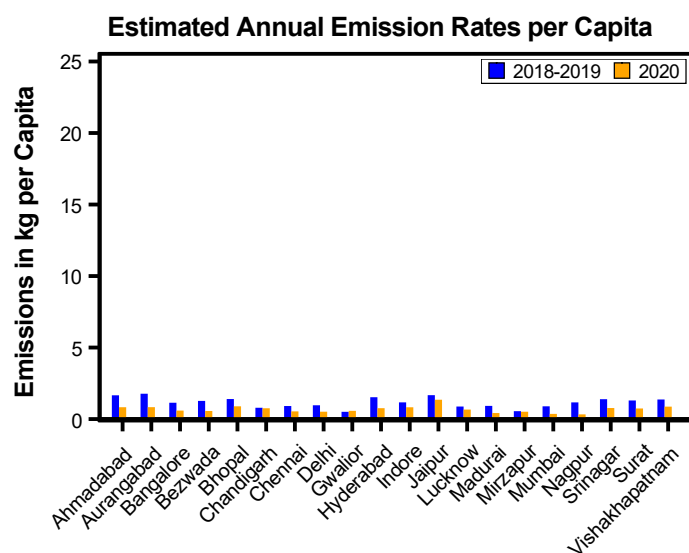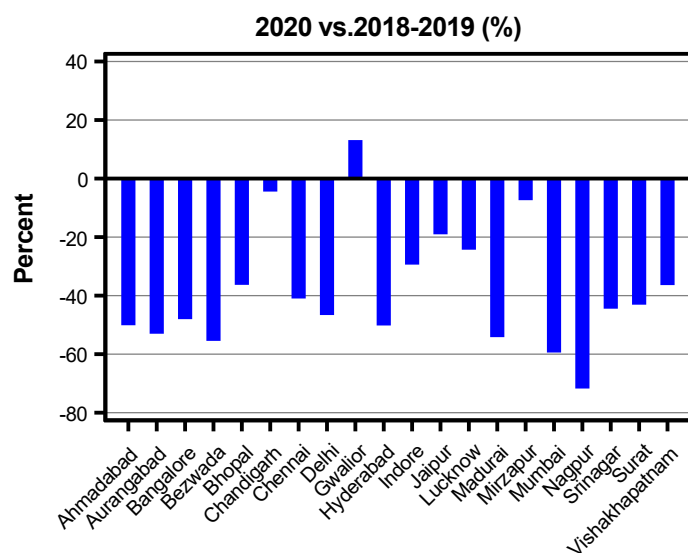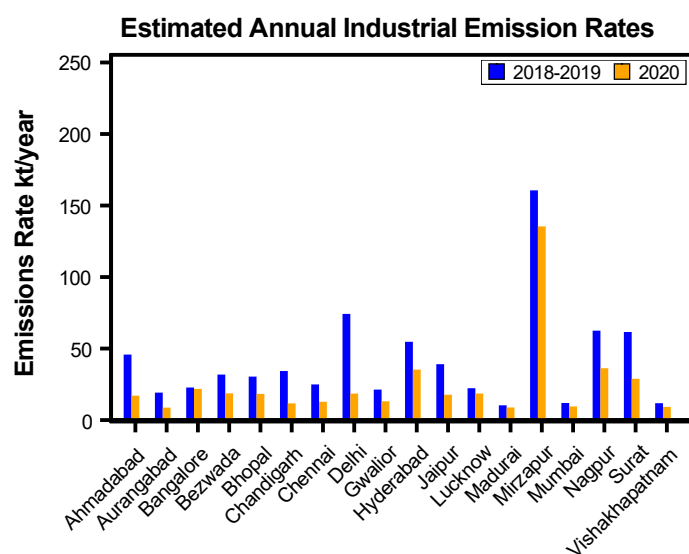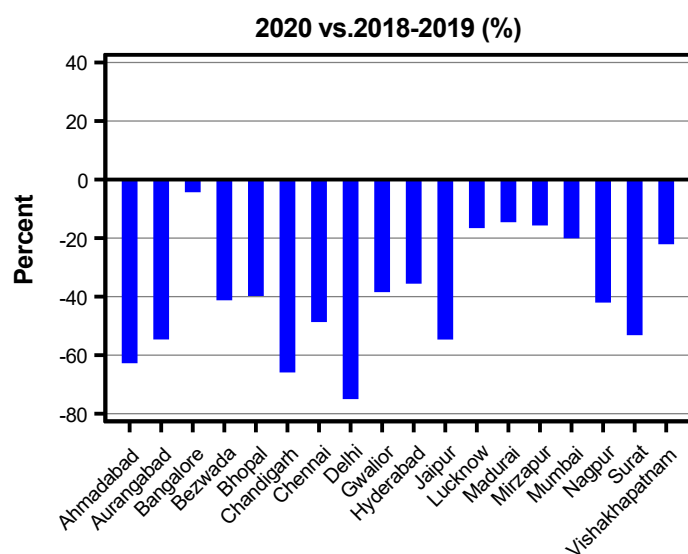

# Europe-1

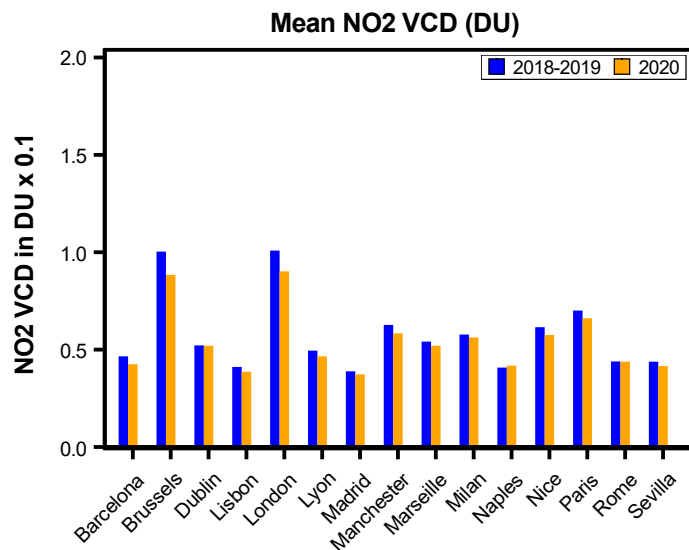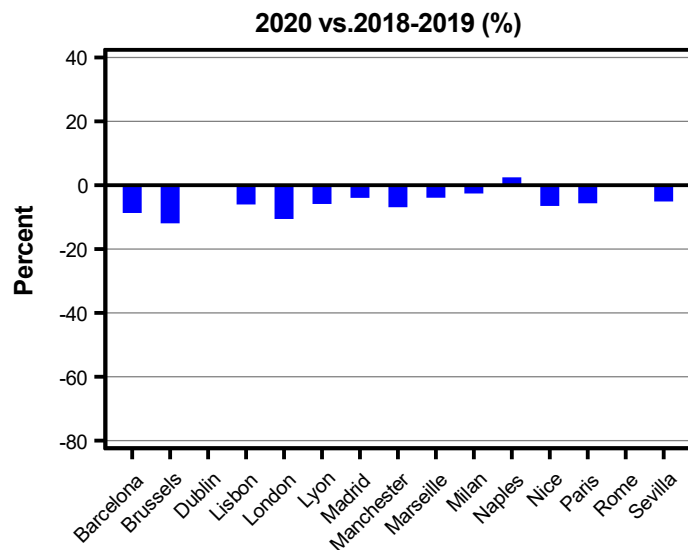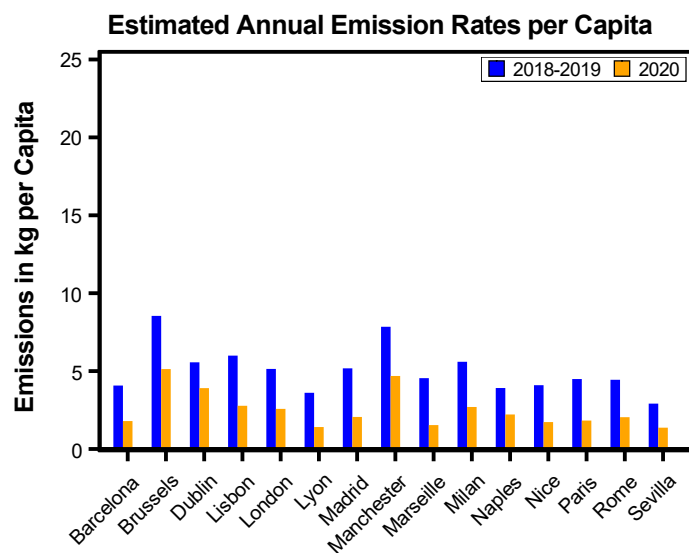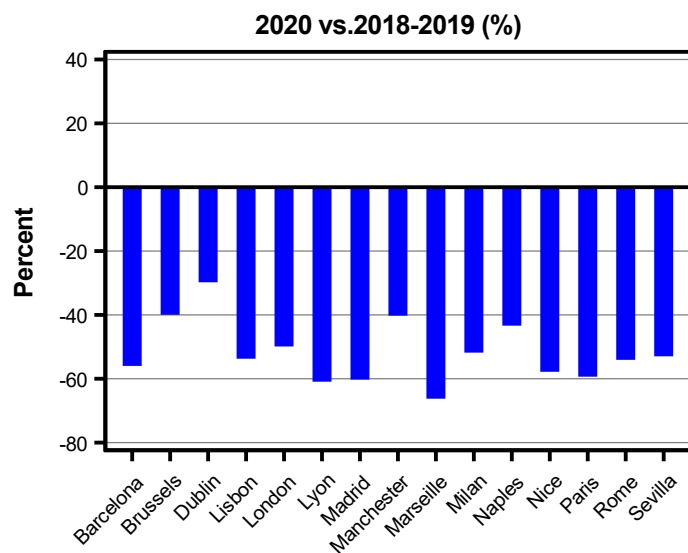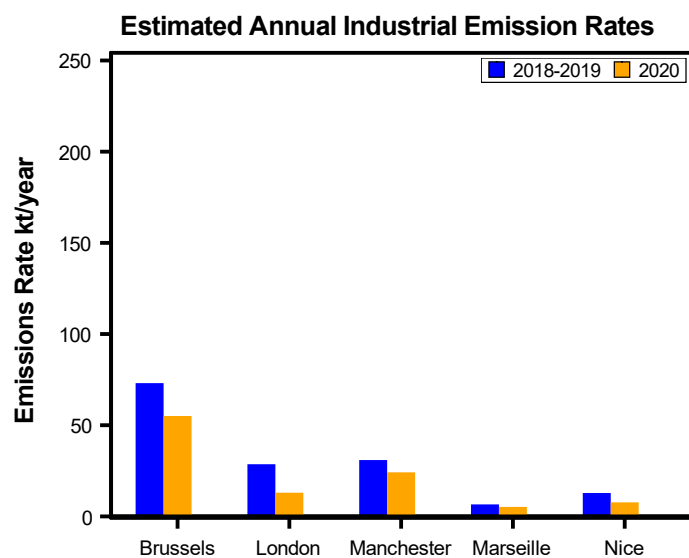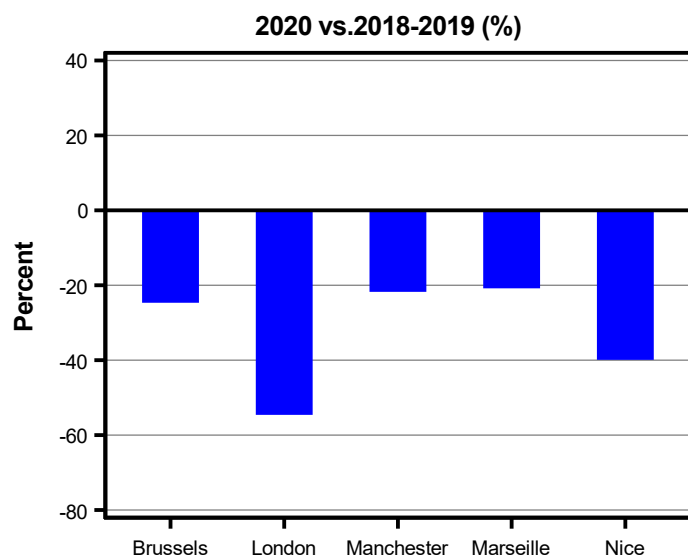

Supplement: Supplementary file 2 [file acp-2021-536-supplement.zip]
