# Supplementary material for: Quantifying urban, industrial, and background changes in NO 2 during the COVID-19 lockdown period based on TROPOMI satellite observations
Source: Copernicus journal article supplement (doi:10.5194/acp-2021-536), 2021-07-06
Supplement: Supplementary file 1 [file acp-2021-536-supplement.zip]

2018 -2019

Region=Africa

Area=Abuja

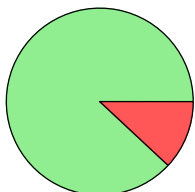

Area=Addis Ababa

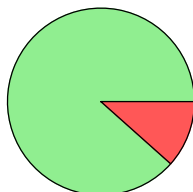

Area=Algiers

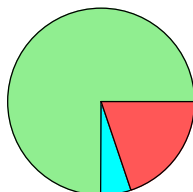

Area=Antananarivo

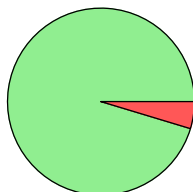

Area=Bamako

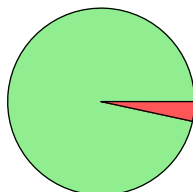

Area=Cairo

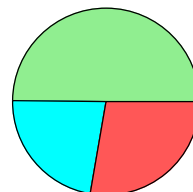

Area=Casablanca

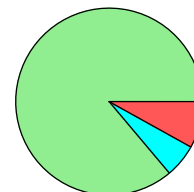

Area=Conakry

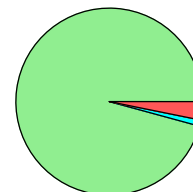

Area=Dakar

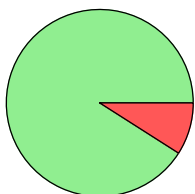

Area=Dar es Salaam

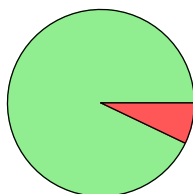

Area=Harare

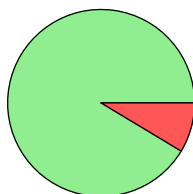

Area=Kano

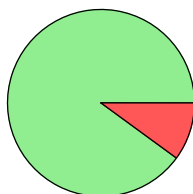

Area=Khartoum

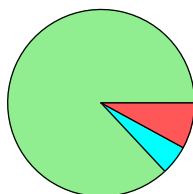

Area=Kinshasa

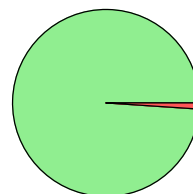

Area=Lagos

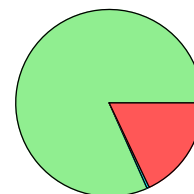

Area=Luanda

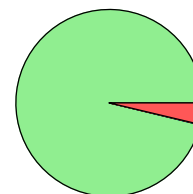

Area=Lubumbashi

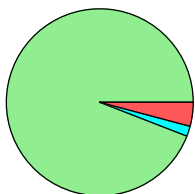

Area=Lusaka

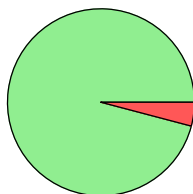

Area=Maputo

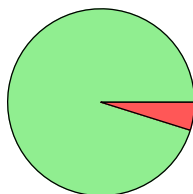

Area=Mombasa

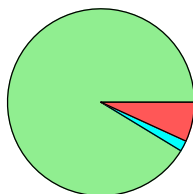

Area=Nairobi

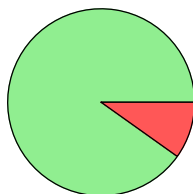

Area=Niamey

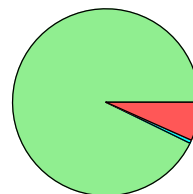

Area=Nouakchott

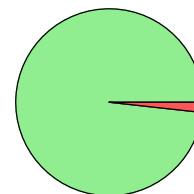

Area=Onitsha

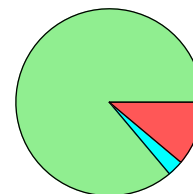

Area=Ouagadougou

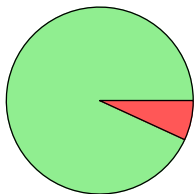

Area=Port Harcourt

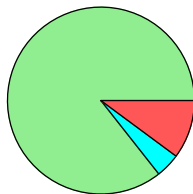

Area=Tripoli

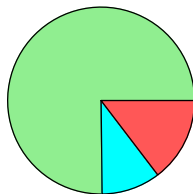

Area=Tunis

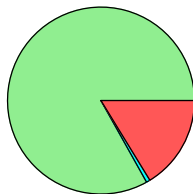

Background

Industry

Population

2018 -2019

Region=Australia and N.Z.

Area=Adelaide

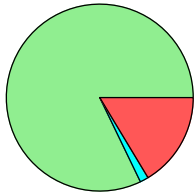

Area=Auckland

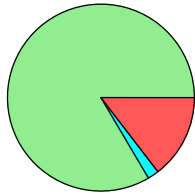

Area=Brisbane

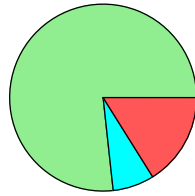

Area=Melbourne

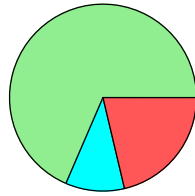

Area=Perth

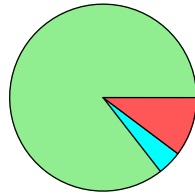

Area=Sydney

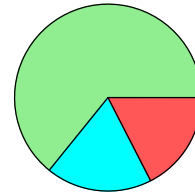

Background

Industry

Population

2018 -2019

Region=Canada and U.S.

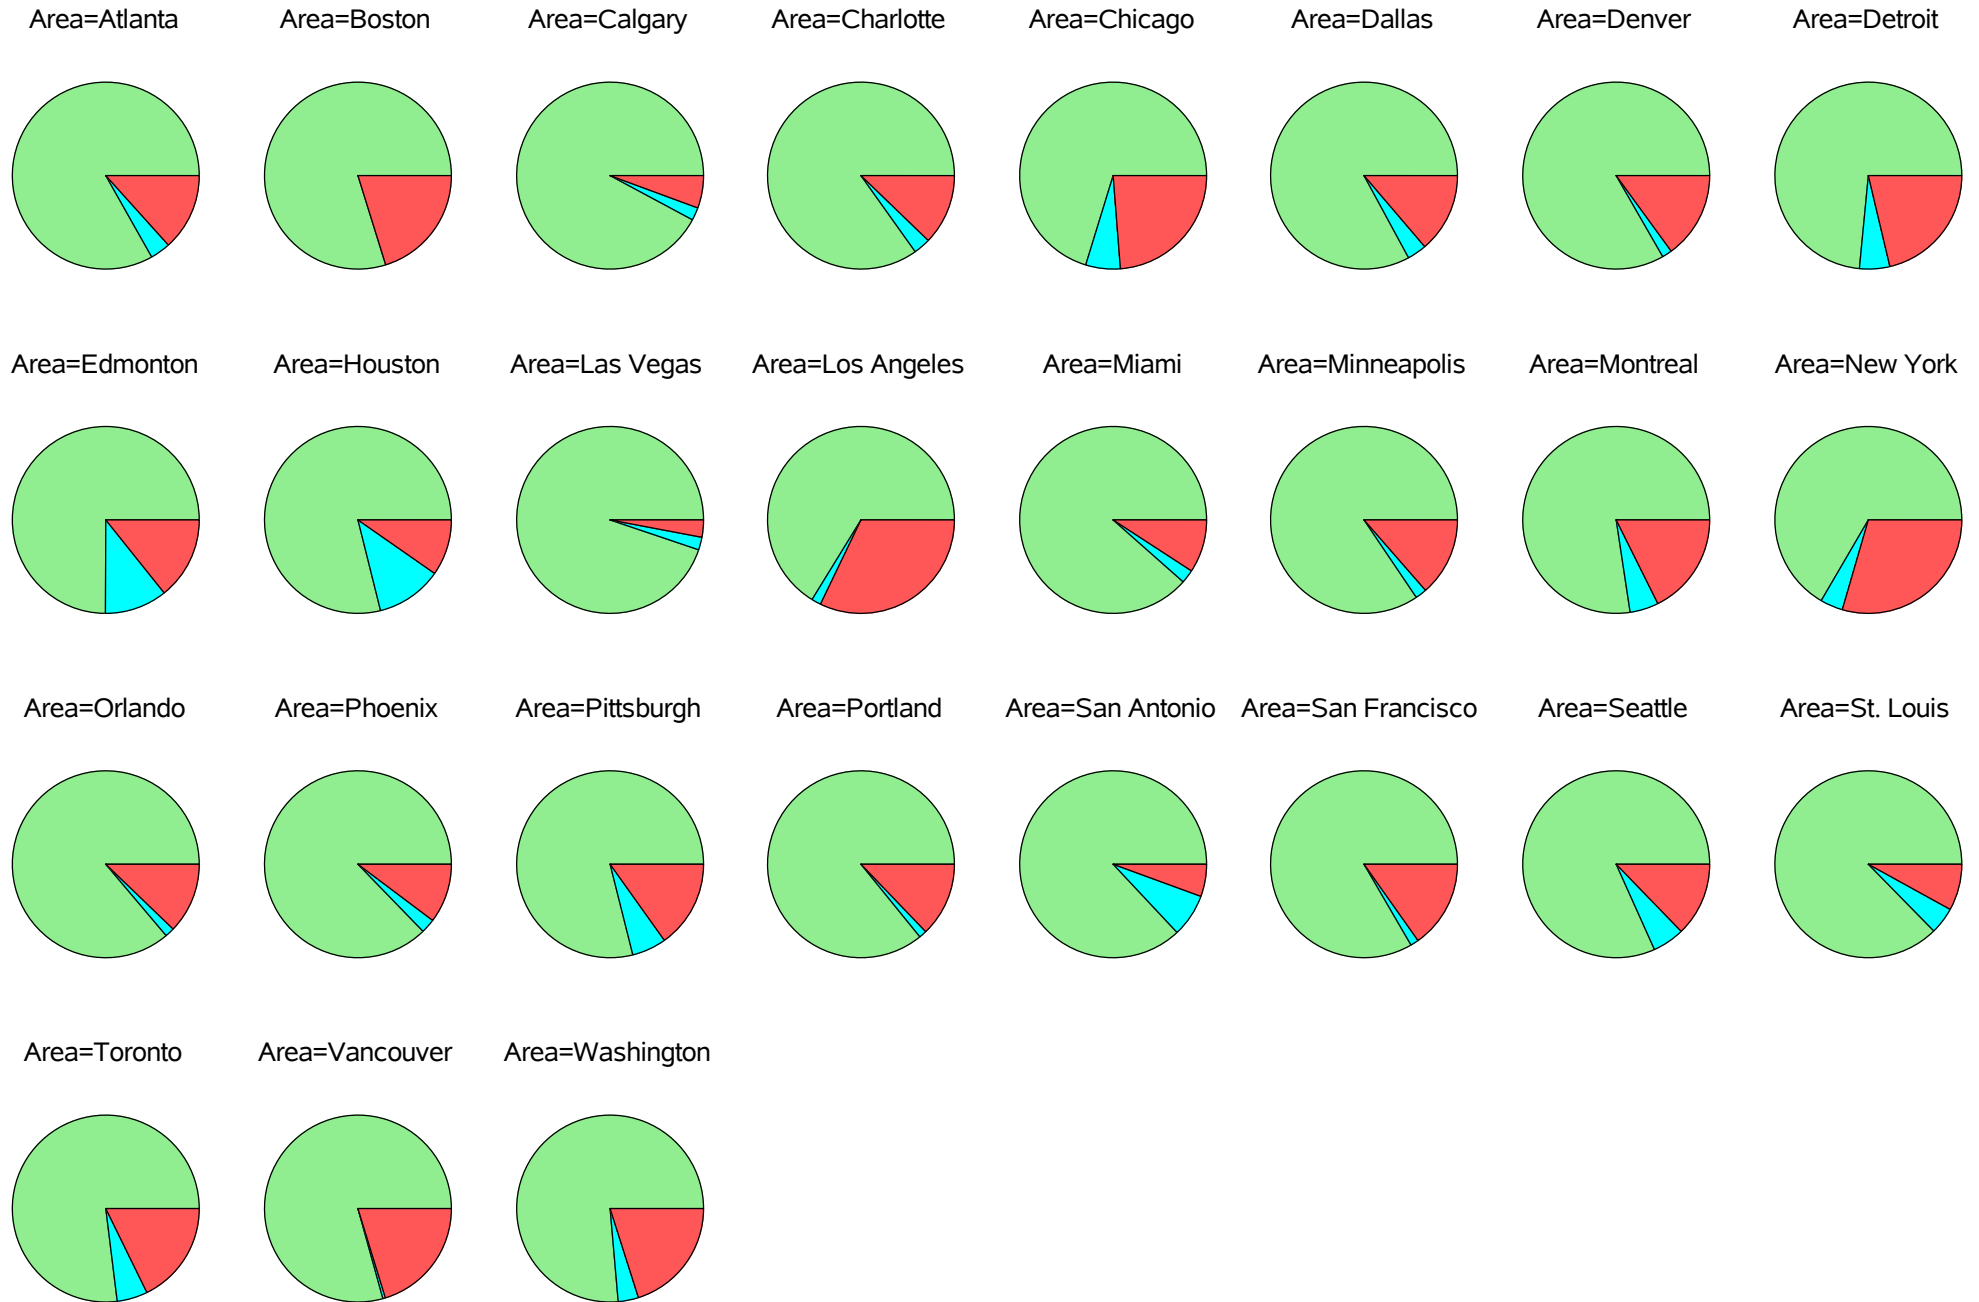

Background Industry Population

2018 -2019

Region=Central America

Area=Guadalajara

Area=Guatemala City

Area=Havana

Area=Leon de los Aldama

Area=Managua

Area=Mexico City

Area=Monterrey

Area=Panama City

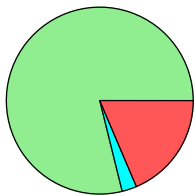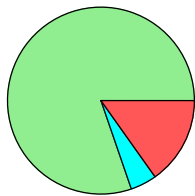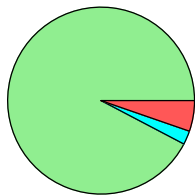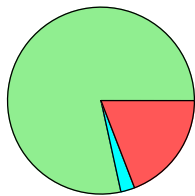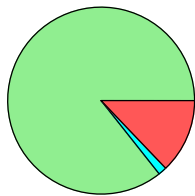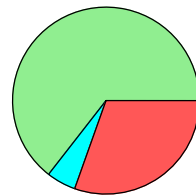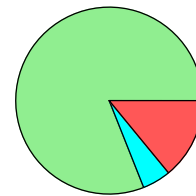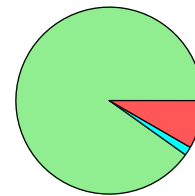

Area=Port-au-Prince

Area=San Salvador

Area=Santo Domingo

Area=Tegucigalpa

Area=Zapopan

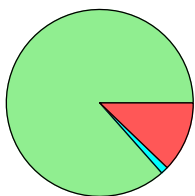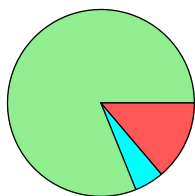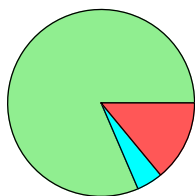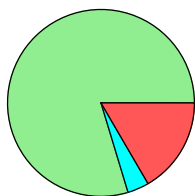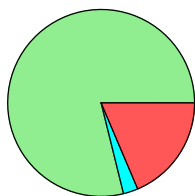

Background

Industry

Population

2018 -2019

Region=China

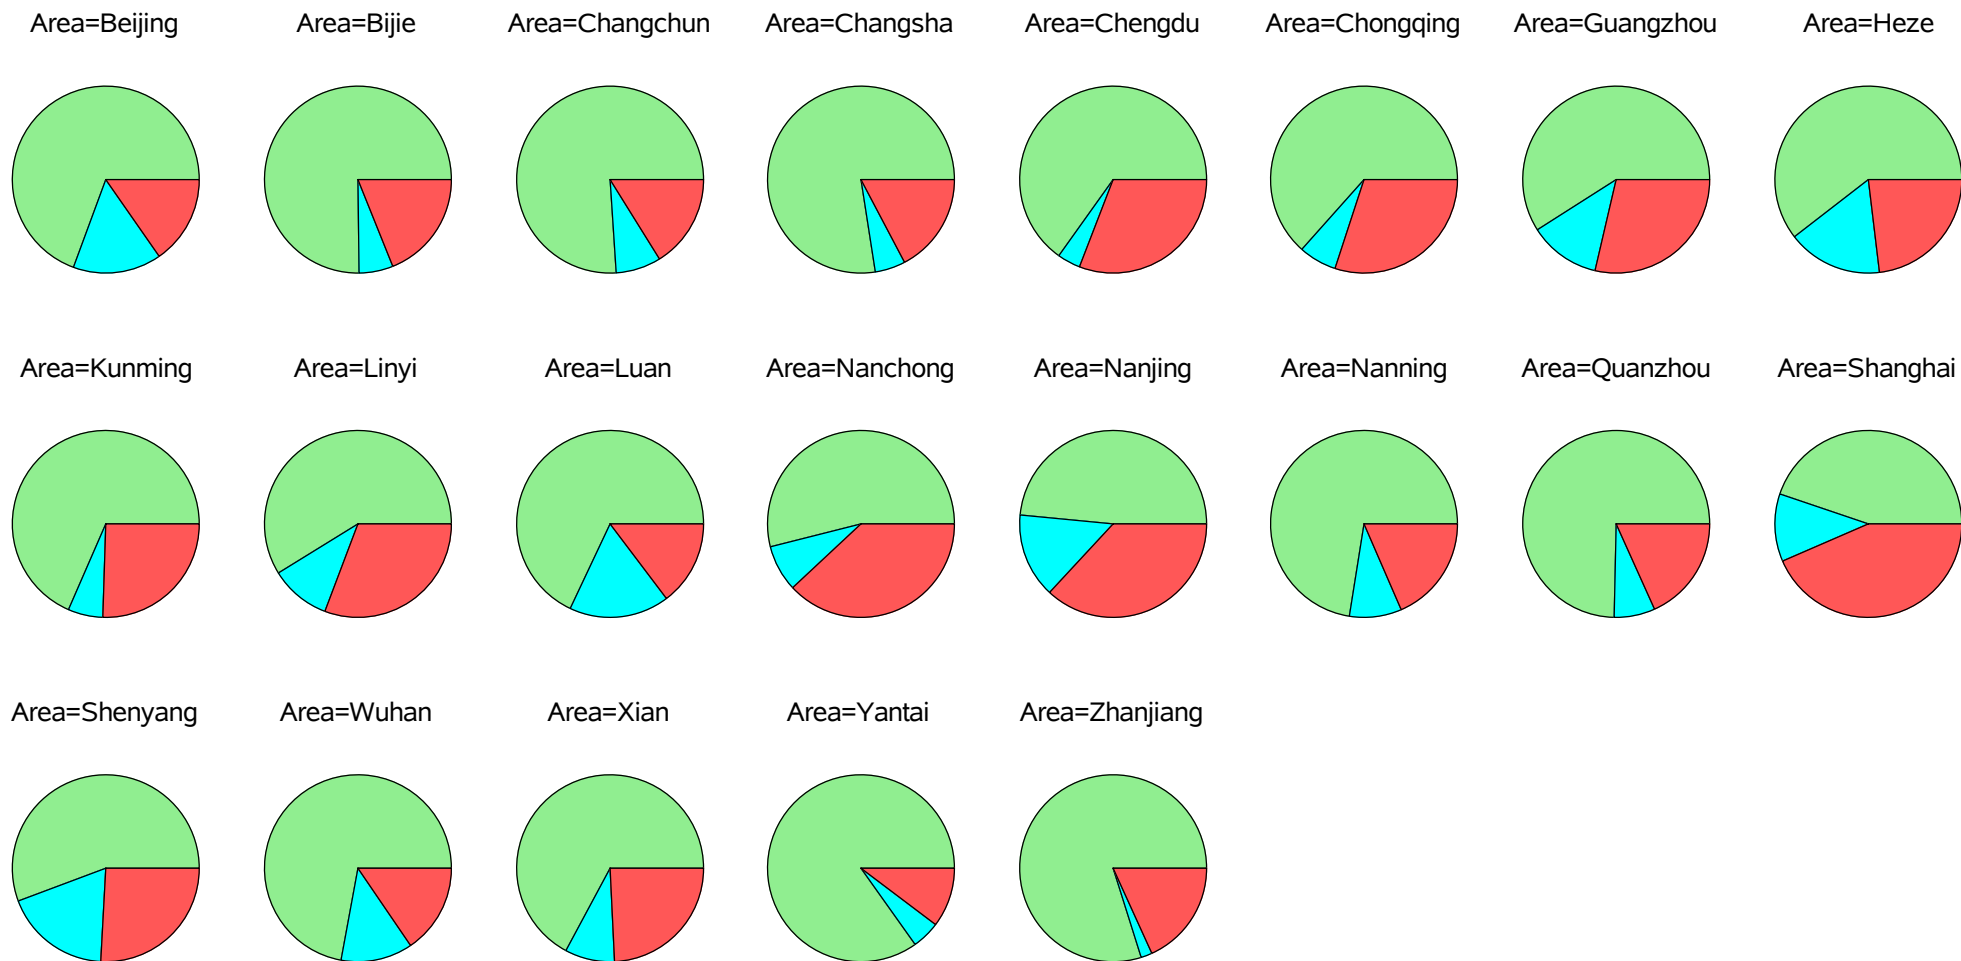

Background Industry Population

2018 -2019

Region=Europe (EU) - 1

Area=Barcelona

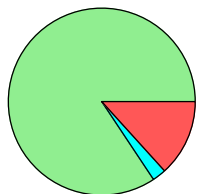

Area=Brussels

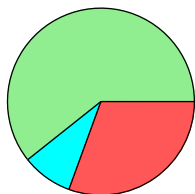

Area=Dublin

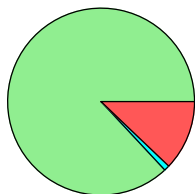

Area=Lisbon

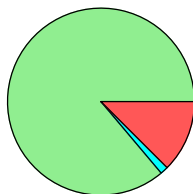

Area=London

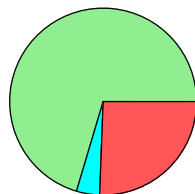

Area=Lyon

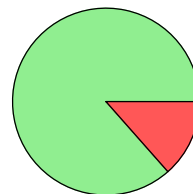

Area=Madrid

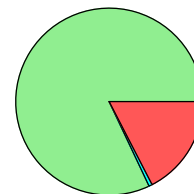

Area=Manchester

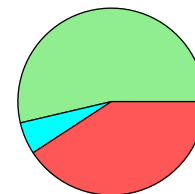

Area=Marseille

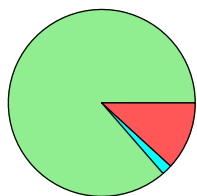

Area=Milan

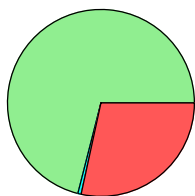

Area=Naples

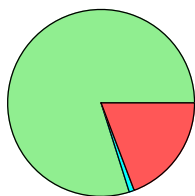

Area=Nice

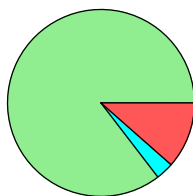

Area=Paris

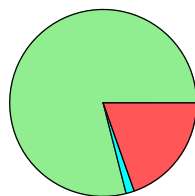

Area=Rome

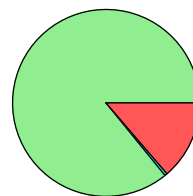

Area=Sevilla

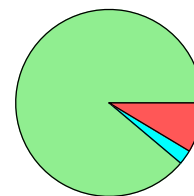

Background

Industry

Population

## Region=Europe (EU) - 2

Area=Amsterdam

Area=Belgrade

Area=Bucharest

Area=Cologne

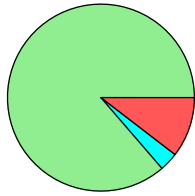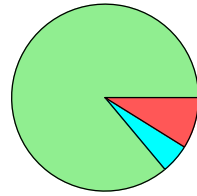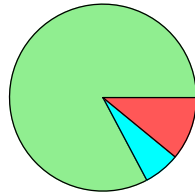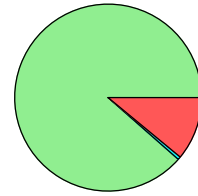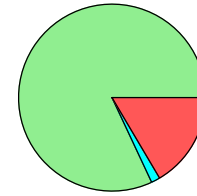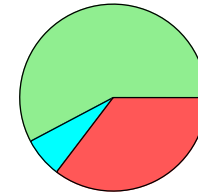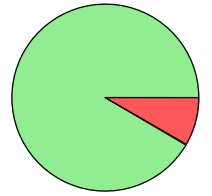

Area=Helsinki

Area=Oslo

Area=Riga

Area=Stockholm

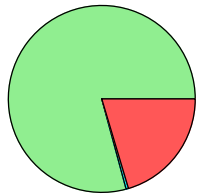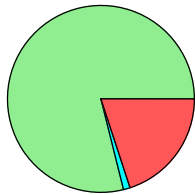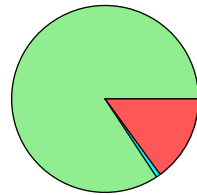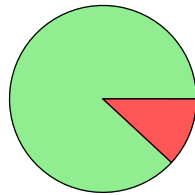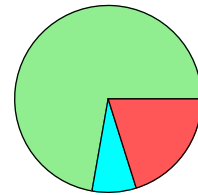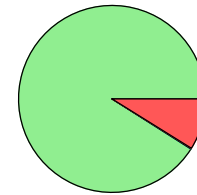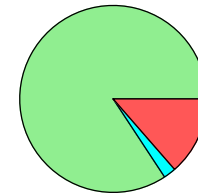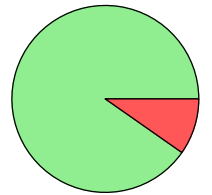

Area=Vienna

Area=Warsaw

Area=Zurich

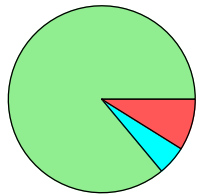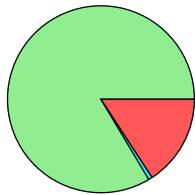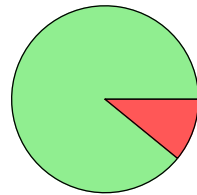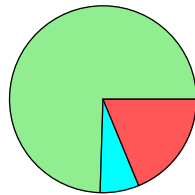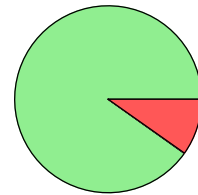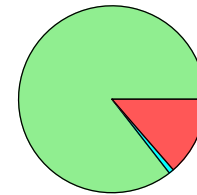

 Population

2018 -2019  
Region=India

Area=Ahmadabad

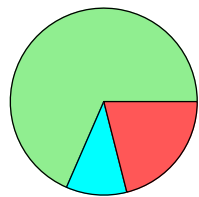

Area=Aurangabad

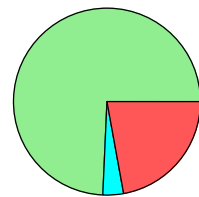

Area=Bangalore

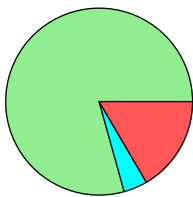

Area=Bezwada

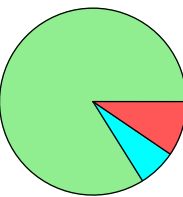

Area=Bhopal

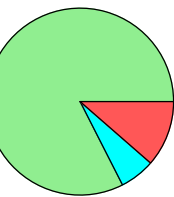

Area=Chandigarh

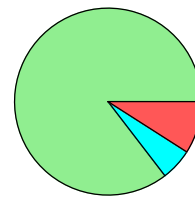

Area=Chennai

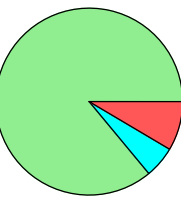

Area=Delhi

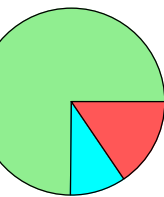

Area=Gwalior

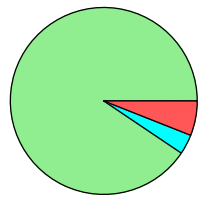

Area=Hyderabad

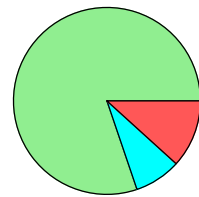

Area=Indore

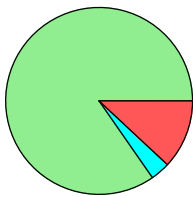

Area=Jaipur

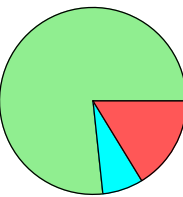

Area=Lucknow

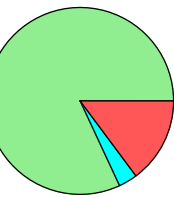

Area=Madurai

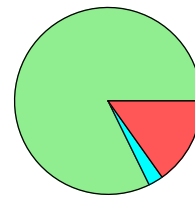

Area=Mirzapur

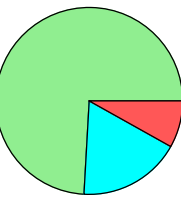

Area=Mumbai

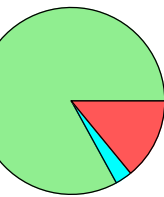

Area=Nagpur

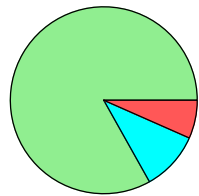

Area=Srinagar

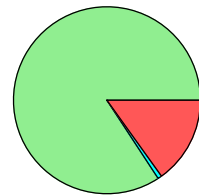

Area=Surat

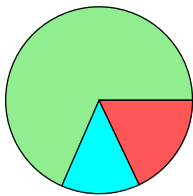

Area=Vishakhapatnam

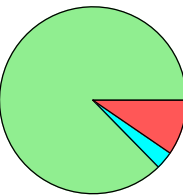

Background Industry Population



2018 -2019

Region=Japan Korea Taiwan

Area=Gwangju

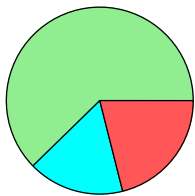

Area=Hiroshima

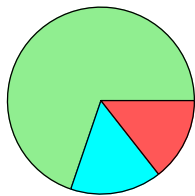

Area=Kaohsiung

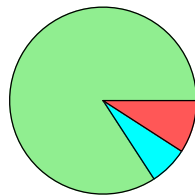

Area=Kitaku

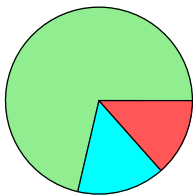

Area=Kyoto

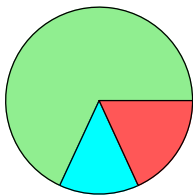

Area=Sapporo

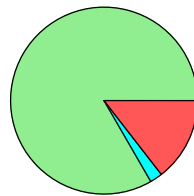

Area=Sendai

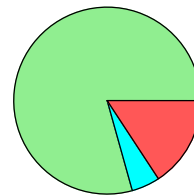

Area=Seoul

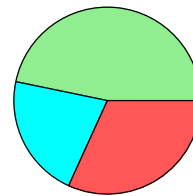

Area=Taipei

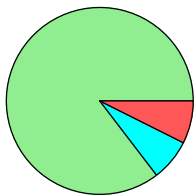

Area=Tokyo

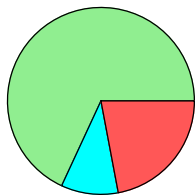

Area=Ulsan

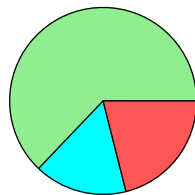

Background

Industry

Population

2018 -2019

Region=Middle East

Area=Al Basrah

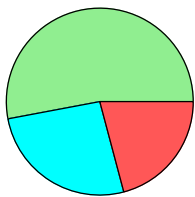

Area=Aleppo

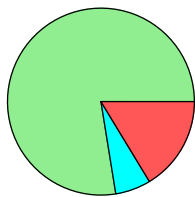

Area=Ankara

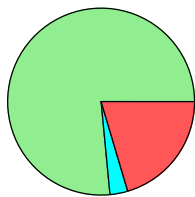

Area=Antalya

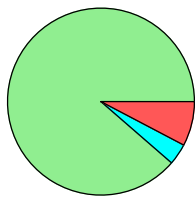

Area=Ashgabat

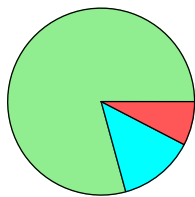

Area=Baghdad

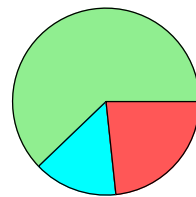

Area=Diyarbakir

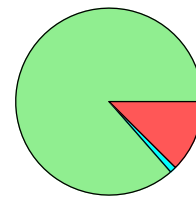

Area=Doha

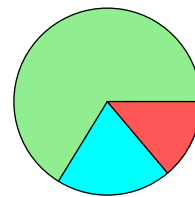

Area=Esfahan

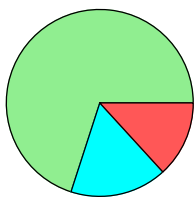

Area=Irbid

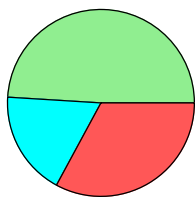

Area=Istanbul

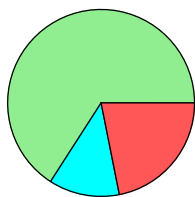

Area=Jeddah

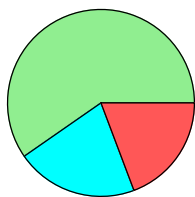

Area=Kayseri

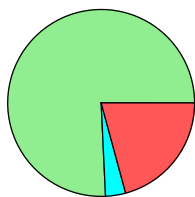

Area=Mashhad

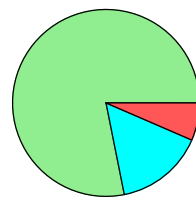

Area=Medina

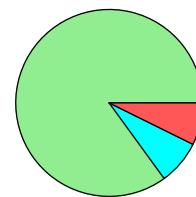

Area=Mersin

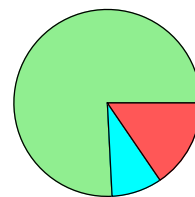

Area=Mosul

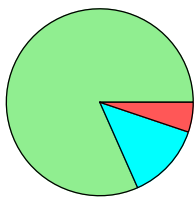

Area=Muscat

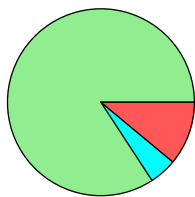

Area=Riyadh

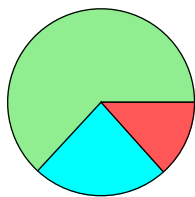

Area=Samsun

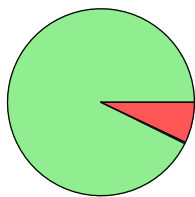

Area=Sanaa

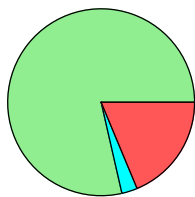

Area=Sharjah

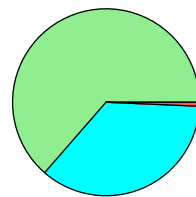

Area=Shiraz

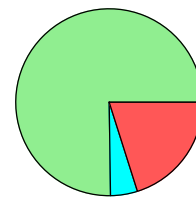

Area=Tabriz

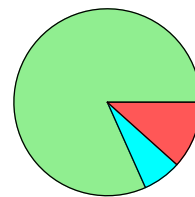

Area=Tehran

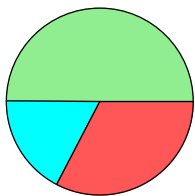

Background

Industry

Population

# 2018 -2019

Region=Northern Eurasia

Area=Almaty

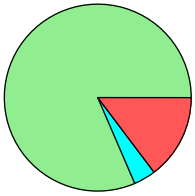

Area=Baku

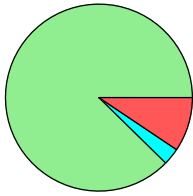

Area=Bishkek

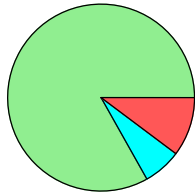

Area=Chelyabinsk

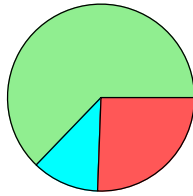

Area=Dnipro

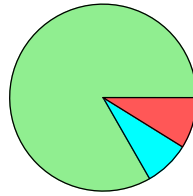

Area=Donetsk

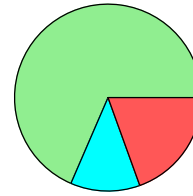

Area=Kazan

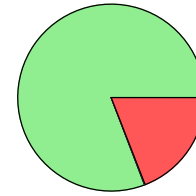

Area=Kharkiv

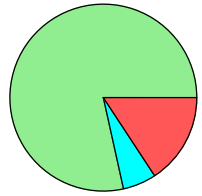

Area=Kyiv

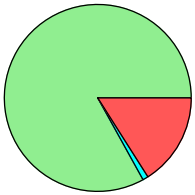

Area=Moscow

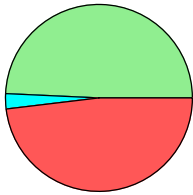

Area=Nizhniy Novgorod

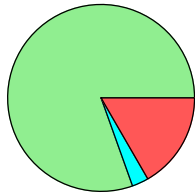

Area=Novosibirsk

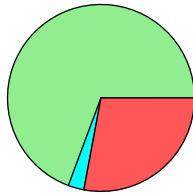

Area=Nur-Sultan

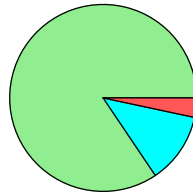

Area=Odesa

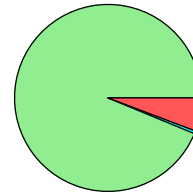

Area=Omsk

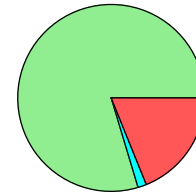

Area=Rostov

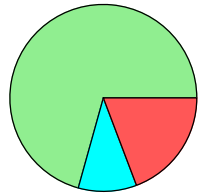

Area=Saint Petersburg

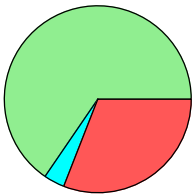

Area=Samara

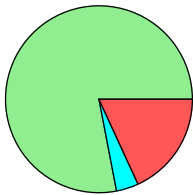

Area=Tashkent

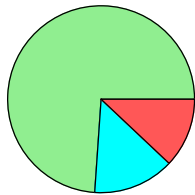

Area=Tbilisi

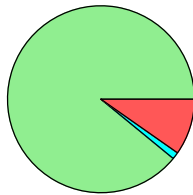

Area=Ufa

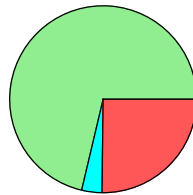

Area=Ulaanbaatar

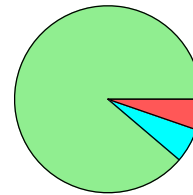

Area=Volgograd

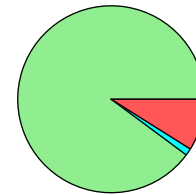

Area=Voronezh

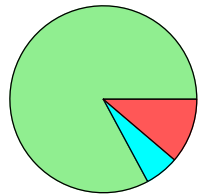

Area=Yekaterinburg

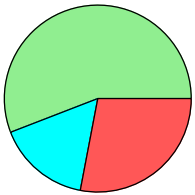

Area=Yerevan

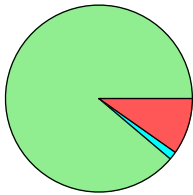

Background

Industry

Population

2018 -2019  
Region=Other

Area=Johannesburg

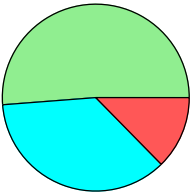

Area=Nicosia

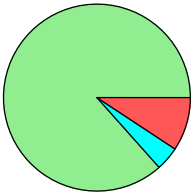

Area=Pyongyang

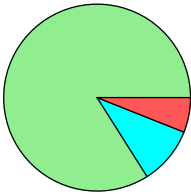

## Region=South America

Area=Arequipa

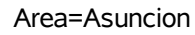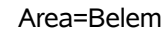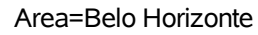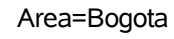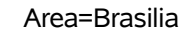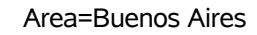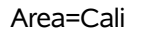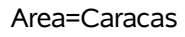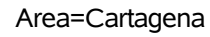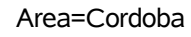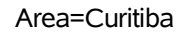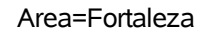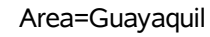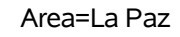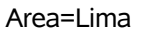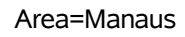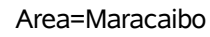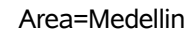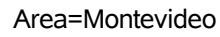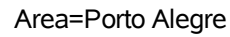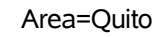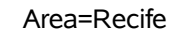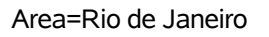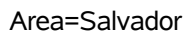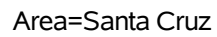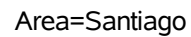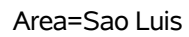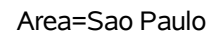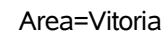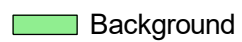

 Industry

 Population

2018 -2019

Region=South-East Asia

Area=Bangkok

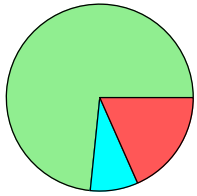

Area=Davao

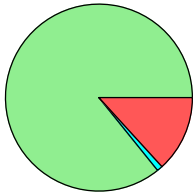

Area=Dhaka

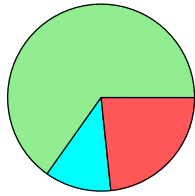

Area=Hanoi

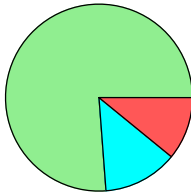

Area=Ho Chi Minh City

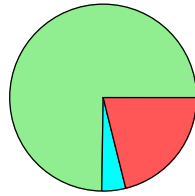

Area=Jakarta

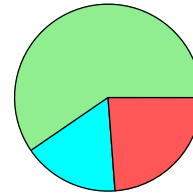

Area=Kabul

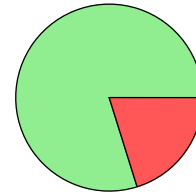

Area=Karachi

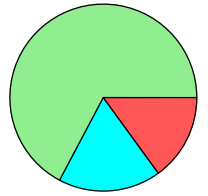

Area=Kuala Lumpur

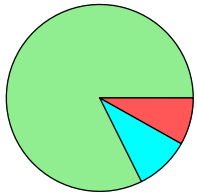

Area=Lahore

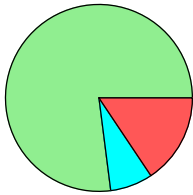

Area=Makassar

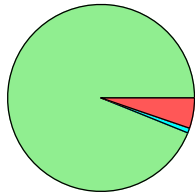

Area=Manila

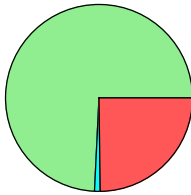

Area=Phnom Penh

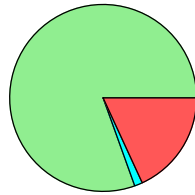

Area=Rangoon

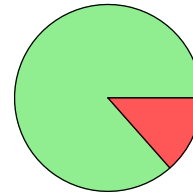

Area=Singapore

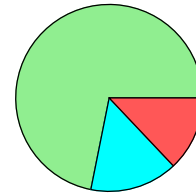

Area=Surabaya

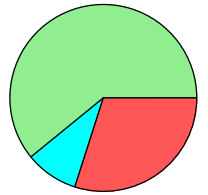

Background

Industry

Population
